# Supplementary material
Source: Royal Society of Chemistry journal article supplement (doi:10.1039/d6nj01557c)

## **Supporting Information**

### **Facile and Direct Synthesis of 1-Phenyl-Substituted $\beta$ -Benzofused Oxygen Heterocycles from Benzoxaboroles and Salicylaldehydes under Amine Catalysis**

## Table of Contents

|                                                                       |    |
|-----------------------------------------------------------------------|----|
| <b>1. General Information</b> .....                                   | 3  |
| <b>2. Optimization of the Reaction Conditions<sup>[a]</sup></b> ..... | 3  |
| <b>3. Experimental Procedures</b> .....                               | 4  |
| <b>4. X-ray Crystallographic Data</b> .....                           | 14 |
| <b>5. NMR Spectrums</b> .....                                         | 16 |

# 1. General Information

Chemicals were purchased from Leyan (Shanghai, China) and used without further purification unless otherwise mentioned. All commercially available reagents and solvents were used without further purification unless otherwise stated. Nuclear Magnetic Resonance spectra were recorded on a Bruker 400 Ultra Shield spectrometer (400 MHz for  $^1\text{H}$ , 101 MHz for  $^{13}\text{C}$ , and 376 MHz for  $^{19}\text{F}$ ) in Chloroform- $d$  and DMSO- $d_6$ . Data are reported as follows: chemical shifts ( $\delta$ ) reported in parts per million (ppm), multiplicity, coupling constants ( $J$ ) reported in Hertz (Hz), and integration. Analytical thin-layer chromatography (TLC) was carried out on precoated plates (silica gel 60 F254), and spots were visualized under ultraviolet light. High-resolution mass spectra (HR-MS) were recorded under electron impact (EI-TOF) (70 eV) condition using a Micro Mass GCT CA 055 instrument.

## 2. Optimization of the Reaction Conditions<sup>[a]</sup>

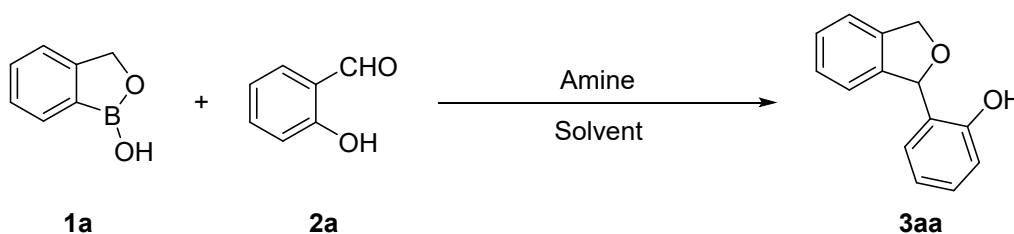

| Entry             | <b>1a:2a</b><br>(mmol:mmol) | Amine/mmol       | Solvent     | Temperature (°C) | Yield (%)              |
|-------------------|-----------------------------|------------------|-------------|------------------|------------------------|
| 1                 | 0.5:0.5                     | morpholine/0.5   | Toluene     | 60               | 18                     |
| 2                 | 0.5:0.5                     | morpholine/0.5   | MeOH        | 60               | trace                  |
| 3                 | 0.5:0.5                     | morpholine/0.5   | DCE         | 60               | 15                     |
| 4                 | 0.5:0.5                     | morpholine/0.5   | Toluene     | 100              | 53                     |
| 5                 | 0.5:0.5                     | morpholine/0.5   | 1,4-dioxane | 100              | 31                     |
| 6                 | 0.5:0.5                     | morpholine/0.5   | Toluene     | 110              | 70                     |
| 7                 | 0.5:0.5                     | piperidine/0.5   | Toluene     | 110              | 55                     |
| 8                 | 0.5:0.5                     | aniline/0.5      | Toluene     | 110              | n.d.                   |
| 9                 | 0.5:0.5                     | -                | Toluene     | 110              | n.d.                   |
| 10                | 0.5:0.75                    | morpholine/0.5   | Toluene     | 110              | 83                     |
| 11                | 0.75:0.5                    | morpholine/0.5   | Toluene     | 110              | 87                     |
| 12                | 1.0:0.5                     | morpholine/0.5   | Toluene     | 110              | 98                     |
| 13                | 1.0:0.5                     | morpholine/0.25  | Toluene     | 110              | 91                     |
| 14                | 1.0:0.5                     | morpholine/0.1   | Toluene     | 110              | 75                     |
| 15 <sup>[b]</sup> | 1.0:0.5                     | morpholine/0.375 | Toluene     | 110              | 98                     |
| 16 <sup>[b]</sup> | 1.0:0.5                     | morpholine/0.25  | Toluene     | 110              | 97                     |
| 17 <sup>[b]</sup> | 1.0:0.5                     | morpholine/0.1   | Toluene     | 110              | 95 (90) <sup>[c]</sup> |

<sup>[a]</sup> Reaction conditions: **1a** (0.5 mmol), **2a** (0.5 mmol), morpholine (0.5 mmol), Toluene (1.5 mL) at 60 °C for 12 h under Ar. <sup>[b]</sup> 200 mg 3 Å MS were added. <sup>[c]</sup> Isolated yield.

### 3. Experimental Procedures

#### 2-(1,3-dihydroisobenzofuran-1-yl)phenol (**3aa**)

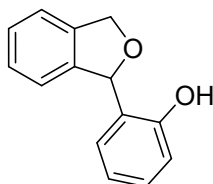

Benzoxaborole (**1a**, 1 mmol, 133.9 mg), salicylaldehyde (0.5 mmol, 61.1 mg), morpholine (0.2 equiv., 8.7 mg), and 3 Å MS (200 mg) were added in a reaction tube with toluene (1.5 mL), and the mixture was stirred under Ar at 110°C for 12 h. The reaction was quenched with saturated NaCl (aq) and extracted with ethyl acetate, dried over MgSO<sub>4</sub>, filtered, and concentrated under vacuum. The residue was chromatographed on silica gel with Petroleum ether/ ethyl acetate (8:1) to afford 2-(1,3-dihydroisobenzofuran-1-yl)phenol (**3aa**) as a white solid (95.5 mg, 90% yield). M.p.: 101.7-102.7°C. <sup>1</sup>H NMR (400 MHz, Chloroform-*d*) δ 7.68 (s, 1H), 7.34 – 7.24 (m, 3H), 7.21 (td, *J* = 7.6, 1.7 Hz, 1H), 7.17 (dd, *J* = 7.6, 1.7 Hz, 1H), 7.13 (d, *J* = 7.3 Hz, 1H), 6.90 (td, *J* = 7.3, 1.2 Hz, 1H), 6.86 (dd, *J* = 8.1, 1.2 Hz, 1H), 6.33 (t, *J* = 2.3 Hz, 1H), 5.29 (dd, *J* = 12.2, 2.1 Hz, 1H), 5.18 (dd, *J* = 12.2, 2.1 Hz, 1H). <sup>13</sup>C NMR (101 MHz, Chloroform-*d*) δ 155.7, 140.3, 138.3, 129.6, 128.1, 127.8, 127.6, 124.3, 122.3, 121.1, 119.9, 117.3, 85.6, 72.6. HRMS (EI<sup>+</sup>) calcd for C<sub>14</sub>H<sub>12</sub>O<sub>2</sub> (M<sup>+</sup>) 212.0837; found, 212.0835.

#### Analytical Data for Other Substrates:

#### 2-(1,3-dihydroisobenzofuran-1-yl)-4-methylphenol (**3ac**)

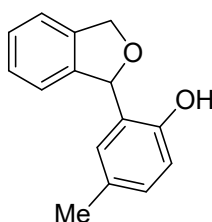

Pale yellow solid (90% yield). M.p.: 109.2-110.7°C. <sup>1</sup>H NMR (400 MHz, Chloroform-*d*) δ 7.40 (s, 1H), 7.32 – 7.22 (m, 3H), 7.13 (d, *J* = 7.2 Hz, 1H), 6.99 (dd, *J* = 8.1, 2.2 Hz, 1H), 6.95 (d, *J* = 2.2 Hz, 1H), 6.75 (d, *J* = 8.1 Hz, 1H), 6.30 (t, *J* = 2.4 Hz, 1H), 5.27 (dd, *J* = 12.2, 2.2 Hz, 1H), 5.15 (dd, *J* = 12.2, 2.2 Hz, 1H), 2.27 (s, 3H). <sup>13</sup>C NMR (101 MHz, Chloroform-*d*) δ 153.2, 140.5, 138.4, 130.0, 129.1, 128.0, 127.8, 124.4, 122.4, 121.1, 117.0, 85.3, 72.6, 20.6. HRMS (EI<sup>+</sup>) calcd for C<sub>15</sub>H<sub>14</sub>O<sub>2</sub> (M<sup>+</sup>) 226.0988; found, 226.0992.

#### 2-(1,3-dihydroisobenzofuran-1-yl)-5-methylphenol (**3ad**)

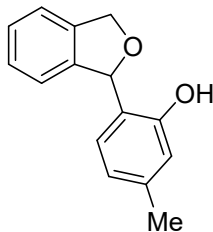

Pale yellow oil (95% yield). <sup>1</sup>H NMR (400 MHz, Chloroform-*d*) δ 7.57 (s, 1H), 7.31 – 7.21 (m, 3H), 7.11 (d, *J* = 7.2 Hz, 1H), 7.03 (d, *J* = 7.7 Hz, 1H), 6.70 (dd, *J* = 7.7, 1.6 Hz, 1H), 6.67 (d, *J* = 1.6 Hz, 1H), 6.30 (t, *J* = 2.4 Hz, 1H), 5.26 (dd, *J* = 12.1, 2.1 Hz, 1H), 5.14 (dd, *J* = 12.3, 2.2 Hz, 1H), 2.27 (s, 3H). <sup>13</sup>C

NMR (101 MHz, Chloroform-*d*)  $\delta$  155.4, 140.6, 139.8, 138.4, 128.0, 127.8, 127.5, 122.3, 121.6, 121.1, 120.8, 117.9, 85.4, 72.5, 21.2. HRMS (EI<sup>+</sup>) calcd for C<sub>15</sub>H<sub>14</sub>O<sub>2</sub> (M<sup>+</sup>) 226.0988; found, 226.0991.

2-(1,3-dihydroisobenzofuran-1-yl)-6-methylphenol (**3ae**)

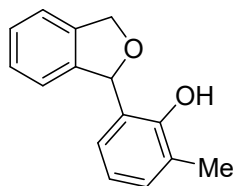

Pale yellow oil (77% yield). <sup>1</sup>H NMR (400 MHz, Chloroform-*d*)  $\delta$  7.88 (s, 1H), 7.32 – 7.21 (m, 3H), 7.09 (d, *J* = 7.5 Hz, 2H), 7.00 (d, *J* = 7.7 Hz, 1H), 6.81 (t, *J* = 7.5 Hz, 1H), 6.28 (t, *J* = 2.4 Hz, 1H), 5.27 (dd, *J* = 12.2, 2.0 Hz, 1H), 5.16 (dd, *J* = 12.2, 2.0 Hz, 1H), 2.20 (s, 3H). <sup>13</sup>C NMR (101 MHz, Chloroform-*d*)  $\delta$  154.0, 140.4, 138.2, 130.9, 128.1, 127.8, 126.2, 125.3, 123.4, 122.4, 121.1, 119.4, 86.3, 72.6, 15.8. HRMS (EI<sup>+</sup>) calcd for C<sub>15</sub>H<sub>14</sub>O<sub>2</sub> (M<sup>+</sup>) 226.0988; found, 226.0989.

2-(1,3-dihydroisobenzofuran-1-yl)-3-fluorophenol (**3af**)

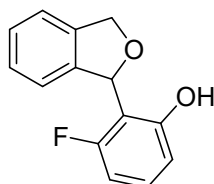

Yellow oil (45% yield). <sup>1</sup>H NMR (400 MHz, Chloroform-*d*)  $\delta$  8.64 (s, 1H), 7.33 – 7.28 (m, 2H), 7.27 – 7.24 (m, 1H), 7.20 – 7.10 (m, 2H), 6.71 – 6.65 (m, 2H), 6.62 (dt, *J* = 8.3, 1.1 Hz, 1H), 5.36 (dd, *J* = 12.3, 2.1 Hz, 1H), 5.21 (dd, *J* = 12.3, 2.6 Hz, 1H). <sup>13</sup>C NMR (101 MHz, Chloroform-*d*)  $\delta$  160.3 (d, *J* = 244.1 Hz), 157.4 (d, *J* = 6.0 Hz), 139.9, 137.5, 129.7 (d, *J* = 10.9 Hz), 128.3, 128.2, 122.1, 120.9, 113.3 (d, *J* = 3.0 Hz), 106.6 (d, *J* = 22.1 Hz), 81.3 (d, *J* = 6.5 Hz), 72.7. <sup>19</sup>F NMR (376 MHz, Chloroform-*d*)  $\delta$  -118.78 – -118.88 (m). HRMS (EI<sup>+</sup>) calcd for C<sub>14</sub>H<sub>11</sub>FO<sub>2</sub> (M<sup>+</sup>) 230.0738; found, 230.0739.

2-(1,3-dihydroisobenzofuran-1-yl)-5-fluorophenol (**3ag**)

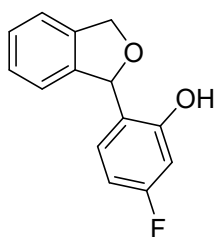

White solid (87% yield). M.p.: 122.8–123.7°C. <sup>1</sup>H NMR (400 MHz, Chloroform-*d*)  $\delta$  7.96 (s, 1H), 7.34 – 7.24 (m, 3H), 7.12 – 7.07 (m, 2H), 6.63 – 6.55 (m, 2H), 6.28 (t, *J* = 2.4 Hz, 1H), 5.26 (dd, *J* = 12.3, 2.0 Hz, 1H), 5.15 (dd, *J* = 12.3, 2.2 Hz, 1H). <sup>13</sup>C NMR (101 MHz, Chloroform-*d*)  $\delta$  163.5 (d, *J* = 245.7 Hz), 157.1 (d, *J* = 12.3 Hz), 139.9, 138.15, 128.5 (d, *J* = 10.3 Hz), 128.1, 127.8, 122.1, 121.1, 120.3 (d, *J* = 3.3 Hz), 106.7 (d, *J* = 21.6 Hz), 104.7 (d, *J* = 24.4 Hz), 85.1, 72.4. <sup>19</sup>F NMR (376 MHz, Chloroform-*d*)  $\delta$  -112.46 – -112.57 (m). HRMS (EI<sup>+</sup>) calcd for C<sub>14</sub>H<sub>11</sub>FO<sub>2</sub> (M<sup>+</sup>) 230.0738; found, 230.0740.

5-chloro-2-(1,3-dihydroisobenzofuran-1-yl)phenol (**3ah**)

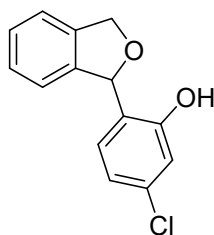

Pale yellow solid (85% yield). M.p.:90.3-91.5°C. <sup>1</sup>H NMR (400 MHz, Chloroform-*d*) δ 7.93 (s, 1H), 7.34 – 7.23 (m, 3H), 7.10 (dd, *J* = 7.1, 1.2 Hz, 1H), 7.08 – 7.04 (m, 1H), 6.88 – 6.84 (m, 2H), 6.29 (t, *J* = 2.2 Hz, 1H), 5.26 (dd, *J* = 12.2, 2.1 Hz, 1H), 5.16 (dd, *J* = 12.2, 2.1 Hz, 1H). <sup>13</sup>C NMR (101 MHz, Chloroform-*d*) δ 156.4, 139.8, 138.2, 134.8, 128.5, 128.3, 128.0, 123.2, 122.2, 121.2, 120.1, 117.6, 84.9, 72.7. HRMS (EI<sup>+</sup>) calcd for C<sub>14</sub>H<sub>11</sub><sup>35</sup>ClO<sub>2</sub> (M<sup>+</sup>) 246.0442; found, 246.0435. HRMS (EI<sup>+</sup>) calcd for C<sub>14</sub>H<sub>11</sub><sup>37</sup>ClO<sub>2</sub> (M<sup>+</sup>) 248.0413; found, 248.0415.

5-bromo-2-(1,3-dihydroisobenzofuran-1-yl)phenol (**3ai**)

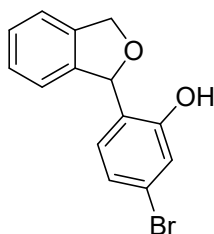

Pale yellow solid (90% yield). M.p.:105.7-106.6°C. <sup>1</sup>H NMR (400 MHz, Chloroform-*d*) δ 7.91 (s, 1H), 7.34 – 7.24 (m, 3H), 7.10 (d, *J* = 7.2 Hz, 1H), 7.04 – 6.98 (m, 3H), 6.28 (t, *J* = 2.4 Hz, 1H), 5.27 (dd, *J* = 12.2, 2.1 Hz, 1H), 5.16 (dd, *J* = 12.2, 2.1 Hz, 1H). <sup>13</sup>C NMR (101 MHz, Chloroform-*d*) δ 156.5, 139.7, 138.2, 128.7, 128.3, 128.0, 123.6, 123.1, 122.7, 122.2, 121.2, 120.5, 85.1, 72.7. HRMS (EI<sup>+</sup>) calcd for C<sub>14</sub>H<sub>11</sub><sup>79</sup>BrO<sub>2</sub> (M<sup>+</sup>) 289.9937; found, 289.9940. HRMS (EI<sup>+</sup>) calcd for C<sub>14</sub>H<sub>11</sub><sup>81</sup>BrO<sub>2</sub> (M<sup>+</sup>) 291.9916; found, 291.9924.

2-(1,3-dihydroisobenzofuran-1-yl)-5-nitrophenol (**3aj**)

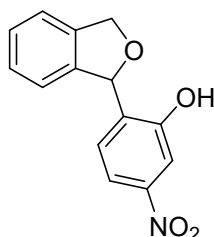

Yellow solid (92% yield). M.p.:118.7-119.7°C. <sup>1</sup>H NMR (400 MHz, Chloroform-*d*) δ 8.38 (s, 1H), 7.76 (dd, *J* = 8.4, 2.2 Hz, 1H), 7.71 (d, *J* = 2.2 Hz, 1H), 7.38 – 7.28 (m, 4H), 7.14 (d, *J* = 7.4 Hz, 1H), 6.43 (t, *J* = 2.4 Hz, 1H), 5.34 (dd, *J* = 12.3, 2.2 Hz, 1H), 5.24 (dd, *J* = 12.3, 2.2 Hz, 1H). <sup>13</sup>C NMR (101 MHz, Chloroform-*d*) δ 156.3, 148.7, 138.9, 138.0, 131.5, 128.6, 128.1, 127.8, 122.1, 121.4, 114.9, 112.5, 84.8, 73.1. HRMS (EI<sup>+</sup>) calcd for C<sub>14</sub>H<sub>11</sub>NO<sub>4</sub> (M<sup>+</sup>) 257.0683; found, 257.0676.

5-(tert-butyl)-2-(1,3-dihydroisobenzofuran-1-yl)phenol (**3ak**)

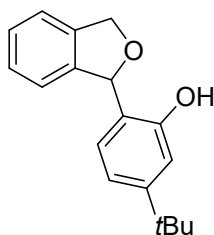

Pale yellow oil (88% yield). <sup>1</sup>H NMR (400 MHz, Chloroform-*d*) δ 7.63 (s, 1H), 7.31 – 7.21 (m, 3H), 7.17 – 7.13 (m, 1H), 7.09 – 7.06 (m, 1H), 6.92 – 6.89 (m, 2H), 6.32 (t, *J* = 2.4 Hz, 1H), 5.26 (dd, *J* = 12.2, 2.1 Hz, 1H), 5.14 (dd, *J* = 12.2, 2.1 Hz, 1H), 1.27 (s, 9H). <sup>13</sup>C NMR (101 MHz, Chloroform-*d*) δ 155.2, 153.2, 140.4, 138.4, 128.0, 127.8, 127.1, 122.5, 121.5, 121.1, 117.0, 114.5, 85.3, 72.5, 34.6, 31.3. HRMS (EI<sup>+</sup>) calcd for C<sub>18</sub>H<sub>20</sub>O<sub>2</sub> (M<sup>+</sup>) 268.1458; found, 268.1458.

2-(1,3-dihydroisobenzofuran-1-yl)-5-methoxyphenol (**3al**)

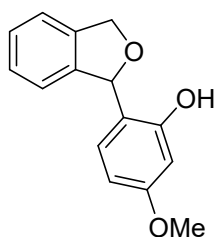

Pale yellow oil (90% yield). <sup>1</sup>H NMR (400 MHz, Chloroform-*d*) δ 7.72 (s, 1H), 7.33 – 7.24 (m, 3H), 7.10 (d, *J* = 7.0 Hz, 1H), 7.05 (d, *J* = 8.2 Hz, 1H), 6.48 – 6.43 (m, 2H), 6.26 (t, *J* = 2.4 Hz, 1H), 5.26 (dd, *J* = 12.2, 2.0 Hz, 1H), 5.15 (dd, *J* = 12.2, 2.0 Hz, 1H), 3.77 (s, 3H). <sup>13</sup>C NMR (101 MHz, Chloroform-*d*) δ 161.0, 157.0, 140.5, 138.3, 128.4, 128.0, 127.8, 122.3, 121.1, 116.7, 106.0, 102.7, 85.5, 72.3, 55.3. HRMS (EI<sup>+</sup>) calcd for C<sub>15</sub>H<sub>14</sub>O<sub>3</sub> (M<sup>+</sup>) 242.0937; found, 242.0930.

2-(1,3-dihydroisobenzofuran-1-yl)-5-(dimethylamino)phenol (**3am**)

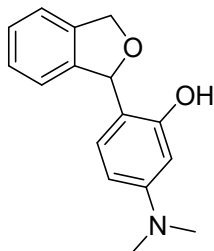

Yellow oil (84% yield). <sup>1</sup>H NMR (400 MHz, Chloroform-*d*) δ 7.47 (s, 1H), 7.30 – 7.24 (m, 3H), 7.14 – 7.08 (m, 1H), 7.00 (d, *J* = 8.3 Hz, 1H), 6.29 (dd, *J* = 8.3, 2.5 Hz, 1H), 6.26 (d, *J* = 2.5 Hz, 1H), 6.23 (t, *J* = 2.2 Hz, 1H), 5.25 (dd, *J* = 12.2, 2.1 Hz, 1H), 5.13 (dd, *J* = 12.2, 2.1 Hz, 1H), 2.92 (s, 6H). <sup>13</sup>C NMR (101 MHz, Chloroform-*d*) δ 156.6, 152.0, 141.0, 138.5, 128.4, 127.8, 127.7, 122.3, 121.0, 112.6, 104.4, 101.2, 85.6, 72.1, 40.5. HRMS (EI<sup>+</sup>) calcd for C<sub>16</sub>H<sub>17</sub>NO<sub>2</sub> (M<sup>+</sup>) 255.1254; found, 255.1255.

3-(1,3-dihydroisobenzofuran-1-yl)-[1,1'-biphenyl]-2-ol (**3an**)

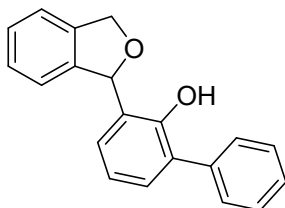

Yellow oil (84% yield). <sup>1</sup>H NMR (400 MHz, Chloroform-*d*) δ 7.52 – 7.48 (m, 2H), 7.43 – 7.39 (m, 2H), 7.34 – 7.23 (m, 6H), 7.21 – 7.16 (m, 2H), 6.95 (t, *J* = 7.6 Hz, 1H), 6.46 (t, *J* = 2.4 Hz, 1H), 5.29 (dd, *J* = 12.2, 2.0 Hz, 1H), 5.18 (dd, *J* = 12.2, 2.0 Hz, 1H). <sup>13</sup>C NMR (101 MHz, Chloroform-*d*) δ 151.9, 140.7, 138.5, 137.7, 130.5, 129.7, 129.5, 128.6, 128.0, 127.8, 127.4, 127.2, 126.0, 122.5, 121.1, 120.1, 84.7, 72.8. HRMS (EI<sup>+</sup>) calcd for C<sub>20</sub>H<sub>16</sub>O<sub>2</sub> (M<sup>+</sup>) 288.1145; found, 288.1144.

4-(1,3-dihydroisobenzofuran-1-yl)pyridin-3-ol (**3ao**)

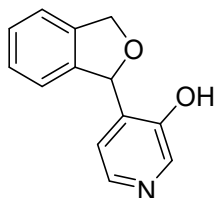

Yellow solid (65% yield). M.p.: 175.8-176.9°C. <sup>1</sup>H NMR (400 MHz, DMSO-*d*<sub>6</sub>) δ 10.26 (s, 1H), 8.23 (s, 1H), 8.00 (d, *J* = 4.8 Hz, 1H), 7.37 – 7.27 (m, 3H), 7.23 (td, *J* = 7.3, 1.3 Hz, 1H), 7.16 (d, *J* = 4.8 Hz, 1H), 6.48 (t, *J* = 2.1 Hz, 1H), 5.36 (dd, *J* = 12.4, 2.8 Hz, 1H), 5.18 (dd, *J* = 12.4, 1.6 Hz, 1H). <sup>13</sup>C NMR (101 MHz, DMSO-*d*<sub>6</sub>) δ 150.9, 141.6, 141.2, 139.0, 138.1, 137.7, 128.3, 128.1, 122.4, 121.7, 121.2, 79.5, 73.5. HRMS (EI<sup>+</sup>) calcd for C<sub>13</sub>H<sub>11</sub>NO<sub>2</sub> (M<sup>+</sup>) 213.0784; found, 213.0788.

2-(5-fluoro-1,3-dihydroisobenzofuran-1-yl)phenol (**3ba**)

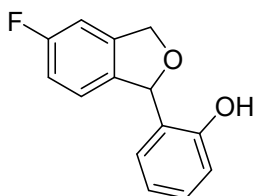

Yellow oil (95% yield). <sup>1</sup>H NMR (400 MHz, Chloroform-*d*) δ 7.46 (s, 1H), 7.20 (td, *J* = 7.7, 1.7 Hz, 1H), 7.13 (dd, *J* = 7.7, 1.7 Hz, 1H), 7.06 (dd, *J* = 8.0, 4.9 Hz, 1H), 6.99 – 6.92 (m, 2H), 6.89 (td, *J* = 7.6, 1.2 Hz, 1H), 6.85 (dd, *J* = 8.0, 1.2 Hz, 1H), 6.31 (s, 1H), 5.24 (dd, *J* = 12.5, 2.1 Hz, 1H), 5.13 (dd, *J* = 12.5, 2.1 Hz, 1H). <sup>13</sup>C NMR (101 MHz, Chloroform-*d*) δ 163.0 (d, *J* = 245.9 Hz), 155.4, 140.6 (d, *J* = 8.7 Hz), 136.0 (d, *J* = 2.4 Hz), 129.7, 127.5, 124.5, 123.7 (d, *J* = 9.1 Hz), 120.1, 117.2, 115.0 (d, *J* = 23.1 Hz), 108.5 (d, *J* = 24.0 Hz), 84.8, 72.2 (d, *J* = 2.9 Hz). <sup>19</sup>F NMR (376 MHz, Chloroform-*d*) δ -114.66 – -114.78 (m). HRMS (EI<sup>+</sup>) calcd for C<sub>14</sub>H<sub>11</sub>FO<sub>2</sub> (M<sup>+</sup>) 230.0738; found, 230.0738.

2-(5-chloro-1,3-dihydroisobenzofuran-1-yl)phenol (**3ca**)

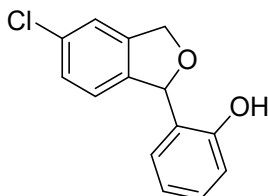

Orange oil (89% yield). <sup>1</sup>H NMR (400 MHz, Chloroform-*d*) δ 7.41 (s, 1H), 7.26 – 7.17 (m, 3H), 7.12 (dd, *J* = 7.7, 1.7 Hz, 1H), 7.04 (d, *J* = 8.0 Hz, 1H), 6.89 (td, *J* = 7.6, 1.2 Hz, 1H), 6.84 (d, *J* = 8.0 Hz, 1H), 6.30 (t, *J* = 2.4 Hz, 1H), 5.24 (dd, *J* = 12.5, 2.1 Hz, 1H), 5.12 (dd, *J* = 12.5, 2.1 Hz, 1H). <sup>13</sup>C NMR (101 MHz, Chloroform-*d*) δ 155.3, 140.4, 139.1, 134.0, 129.8, 128.1, 127.5, 124.4, 123.5, 121.5, 120.2, 117.2, 84.7, 72.1. HRMS (EI<sup>+</sup>) calcd for C<sub>14</sub>H<sub>11</sub><sup>35</sup>ClO<sub>2</sub> (M<sup>+</sup>) 246.0442; found, 246.0439. HRMS (EI<sup>+</sup>) calcd for C<sub>14</sub>H<sub>11</sub><sup>37</sup>ClO<sub>2</sub> (M<sup>+</sup>) 248.0413; found, 248.0414.

2-(5-methyl-1,3-dihydroisobenzofuran-1-yl)phenol (**3da**)

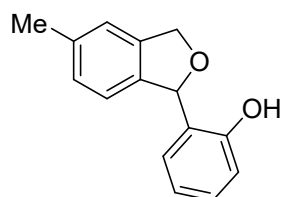

Pale yellow oil (94% yield).  $^1\text{H}$  NMR (400 MHz, Chloroform-*d*)  $\delta$  7.73 (s, 1H), 7.25 – 7.16 (m, 3H), 7.11 (d,  $J$  = 7.7 Hz, 1H), 6.94 – 6.89 (m, 2H), 6.87 (dd,  $J$  = 8.1, 1.2 Hz, 1H), 6.26 (t,  $J$  = 2.4 Hz, 1H), 5.26 (dd,  $J$  = 12.0, 2.6 Hz, 1H), 5.14 (dd,  $J$  = 12.0, 2.6 Hz, 1H), 2.32 (s, 3H).  $^{13}\text{C}$  NMR (101 MHz, Chloroform-*d*)  $\delta$  155.7, 140.5, 137.8, 135.4, 129.5, 129.0, 127.6, 124.3, 122.7, 120.8, 119.9, 117.3, 85.8, 72.4, 21.4. HRMS (EI<sup>+</sup>) calcd for C<sub>15</sub>H<sub>14</sub>O<sub>2</sub> (M<sup>+</sup>) 226.0988; found, 226.0990.

2-(6-methoxy-1,3-dihydroisobenzofuran-1-yl)phenol (**3ea**)

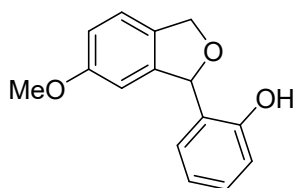

Pale yellow oil (90% yield).  $^1\text{H}$  NMR (400 MHz, Chloroform-*d*)  $\delta$  7.69 (s, 1H), 7.25 – 7.15 (m, 3H), 6.93 – 6.83 (m, 3H), 6.62 (d,  $J$  = 2.4 Hz, 1H), 6.27 (t,  $J$  = 2.5 Hz, 1H), 5.23 (dd,  $J$  = 11.6, 2.3 Hz, 1H), 5.11 (dd,  $J$  = 11.6, 2.3 Hz, 1H), 3.74 (s, 3H).  $^{13}\text{C}$  NMR (101 MHz, Chloroform-*d*)  $\delta$  159.9, 155.6, 142.1, 130.3, 129.6, 127.6, 124.3, 121.8, 120.0, 117.3, 114.2, 107.7, 85.6, 72.3, 55.6. HRMS (EI<sup>+</sup>) calcd for C<sub>15</sub>H<sub>14</sub>O<sub>3</sub> (M<sup>+</sup>) 242.0937; found, 242.0934.

2-(5-methoxy-1,3-dihydroisobenzofuran-1-yl)phenol (**3fa**)

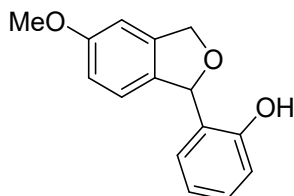

White solid (96% yield). M.p.: 136.4–137.3°C.  $^1\text{H}$  NMR (400 MHz, Chloroform-*d*)  $\delta$  7.69 (s, 1H), 7.23 – 7.12 (m, 2H), 7.03 – 6.99 (m, 1H), 6.90 – 6.77 (m, 4H), 6.28 (t,  $J$  = 2.4 Hz, 1H), 5.22 (dd,  $J$  = 12.3, 2.1 Hz, 1H), 5.11 (dd,  $J$  = 12.3, 2.1 Hz, 1H), 3.78 (s, 3H).  $^{13}\text{C}$  NMR (101 MHz, Chloroform-*d*)  $\delta$  160.1, 155.5, 140.1, 132.4, 129.5, 127.5, 124.9, 123.2, 120.0, 117.2, 114.0, 106.4, 85.1, 72.5, 55.6. HRMS (EI<sup>+</sup>) calcd for C<sub>15</sub>H<sub>14</sub>O<sub>3</sub> (M<sup>+</sup>) 242.0937; found, 242.0939.

2-(4-methoxy-1,3-dihydroisobenzofuran-1-yl)phenol (**3ga**)

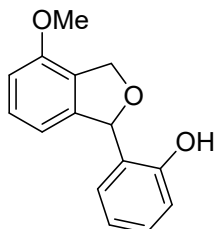

Orange oil (86% yield).  $^1\text{H}$  NMR (400 MHz, Chloroform-*d*)  $\delta$  7.80 (s, 1H), 7.25 – 7.14 (m, 3H), 6.91 – 6.83 (m, 2H), 6.77 (d,  $J$  = 8.1 Hz, 1H), 6.71 (d,  $J$  = 7.5 Hz, 1H), 6.33 (t,  $J$  = 2.4 Hz, 1H), 5.30 (dd,  $J$  = 12.3, 2.3 Hz, 1H), 5.14 (dd,  $J$  = 12.3, 2.3 Hz, 1H), 3.84 (s, 3H).  $^{13}\text{C}$  NMR (101 MHz, Chloroform-*d*)  $\delta$

155.6, 154.2, 142.2, 129.7, 129.5, 127.5, 126.2, 124.5, 119.9, 117.2, 114.4, 109.6, 86.1, 71.2, 55.4.  
HRMS (EI<sup>+</sup>) calcd for C<sub>15</sub>H<sub>14</sub>O<sub>3</sub> (M<sup>+</sup>) 242.0937; found, 242.0936.

2-(3-methyl-1,3-dihydroisobenzofuran-1-yl)phenol (**3ha**)

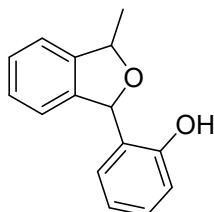

Yellow oil (94% yield). d.r.=1.7:1. major isomer: <sup>1</sup>H NMR (400 MHz, Chloroform-*d*) δ 7.97 (s, 1H), 7.22 – 7.18 (m, 5H), 7.02 (d, *J* = 7.5 Hz, 1H), 6.92 (td, *J* = 7.5, 1.2 Hz, 1H), 6.86 (d, *J* = 7.5 Hz, 1H), 6.19 (d, *J* = 2.3 Hz, 1H), 5.38 (qd, *J* = 6.4, 2.3 Hz, 1H), 1.69 (d, *J* = 6.4 Hz, 3H). <sup>13</sup>C NMR (101 MHz, Chloroform-*d*) δ 155.7, 142.5, 141.0, 129.6, 128.2, 128.0, 127.8, 124.0, 122.1, 120.8, 119.8, 117.3, 84.9, 79.6, 20.9. HRMS (EI<sup>+</sup>) calcd for C<sub>15</sub>H<sub>14</sub>O<sub>2</sub> (M<sup>+</sup>) 226.0988; found, 226.0992.

2-(isochroman-1-yl)phenol (**3ia**)

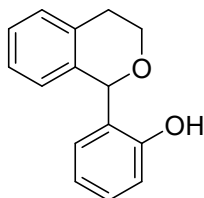

Pale yellow solid (85% yield). M.p.:132.8-134.0°C. <sup>1</sup>H NMR (400 MHz, Chloroform-*d*) δ 7.43 (s, 1H), 7.26 – 7.16 (m, 3H), 7.11 (td, *J* = 7.3, 1.4 Hz, 1H), 7.03 (dd, *J* = 7.5, 1.3 Hz, 1H), 6.94 – 6.81 (m, 3H), 5.89 (s, 1H), 4.25 (dt, *J* = 11.5, 5.4 Hz, 1H), 4.00 (ddd, *J* = 11.5, 8.7, 4.7 Hz, 1H), 3.11 (ddd, *J* = 16.8, 8.7, 5.4 Hz, 1H), 2.92 (dt, *J* = 16.8, 4.7 Hz, 1H). <sup>13</sup>C NMR (101 MHz, Chloroform-*d*) δ 155.6, 135.1, 132.8, 129.8, 129.6, 129.0, 127.3, 126.4, 126.2, 125.8, 119.6, 117.3, 79.0, 64.3, 28.5. HRMS (EI<sup>+</sup>) calcd for C<sub>15</sub>H<sub>14</sub>O<sub>2</sub> (M<sup>+</sup>) 226.0988; found, 226.0992.

5-bromo-2-(isochroman-1-yl)phenol (**3ja**)

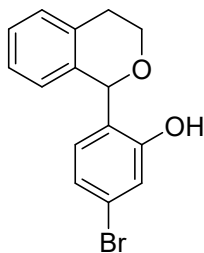

Pale yellow solid (88% yield). M.p.:117.3-118.4°C. <sup>1</sup>H NMR (400 MHz, Chloroform-*d*) δ 7.61 (s, 1H), 7.24 – 7.09 (m, 3H), 7.06 (d, *J* = 2.0 Hz, 1H), 6.99 (dd, *J* = 8.1, 2.0 Hz, 1H), 6.87 (d, *J* = 8.1 Hz, 1H), 6.81 (d, *J* = 7.7 Hz, 1H), 5.84 (s, 1H), 4.21 (dt, *J* = 11.4, 5.2 Hz, 1H), 3.97 (ddd, *J* = 11.4, 8.6, 4.7 Hz, 1H), 3.07 (ddd, *J* = 16.7, 8.6, 5.8 Hz, 1H), 2.90 (dt, *J* = 16.7, 4.7 Hz, 1H). <sup>13</sup>C NMR (101 MHz, Chloroform-*d*) δ 156.5, 134.50, 132.8, 130.7, 129.1, 127.6, 126.3, 125.0, 123.0, 122.7, 120.6, 78.4, 64.3, 28.4. HRMS (EI<sup>+</sup>) calcd for C<sub>15</sub>H<sub>13</sub><sup>79</sup>BrO<sub>2</sub> (M<sup>+</sup>) 304.0093; found, 304.0097. HRMS (EI<sup>+</sup>) calcd for C<sub>15</sub>H<sub>13</sub><sup>81</sup>BrO<sub>2</sub> (M<sup>+</sup>) 306.0073; found, 306.0076.

2-(isochroman-1-yl)-5-methylphenol (**3ka**)

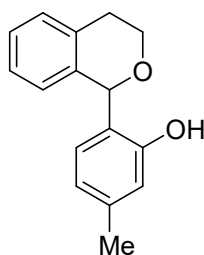

Pale yellow solid (86% yield). M.p.:92.9-94.4°C. <sup>1</sup>H NMR (400 MHz, Chloroform-*d*) δ 7.32 (s, 1H), 7.22 – 7.14 (m, 2H), 7.10 (td, *J* = 7.4, 1.7 Hz, 1H), 6.89 (d, *J* = 7.7 Hz, 1H), 6.85 (d, *J* = 7.7 Hz, 1H), 6.72 (d, *J* = 1.6 Hz, 1H), 6.67 (dd, *J* = 7.7, 1.7 Hz, 1H), 5.85 (s, 1H), 4.23 (dt, *J* = 11.5, 5.2 Hz, 1H), 3.97 (ddd, *J* = 11.5, 8.6, 4.7 Hz, 1H), 3.08 (ddd, *J* = 16.7, 8.6, 5.7 Hz, 1H), 2.90 (dt, *J* = 16.7, 4.7 Hz, 1H), 2.29 (s, 3H). <sup>13</sup>C NMR (101 MHz, Chloroform-*d*) δ 155.4, 140.0, 135.4, 132.9, 129.4, 129.0, 127.3, 126.5, 126.2, 123.05, 120.4, 117.8, 78.7, 64.2, 28.5, 21.2. HRMS (EI<sup>+</sup>) calcd for C<sub>16</sub>H<sub>16</sub>O<sub>2</sub> (M<sup>+</sup>) 240.1145; found, 240.1145.

2-(1,3,4,5-tetrahydrobenzo[*c*]oxepin-1-yl)phenol (**3la**)

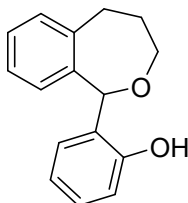

Yellow oil (79% yield). <sup>1</sup>H NMR (400 MHz, Chloroform-*d*) δ 7.78 (s, 1H), 7.21 – 7.09 (m, 3H), 6.99 (td, *J* = 7.3, 1.7 Hz, 1H), 6.92 (d, *J* = 8.1 Hz, 1H), 6.82 – 6.75 (m, 2H), 6.62 (d, *J* = 7.7 Hz, 1H), 5.84 (s, 1H), 4.30 (dt, *J* = 12.3, 3.7 Hz, 1H), 4.00 (ddd, *J* = 13.0, 9.5, 4.0 Hz, 1H), 3.13 (ddd, *J* = 14.3, 9.8, 3.4 Hz, 1H), 2.93 (ddd, *J* = 14.7, 7.0, 2.9 Hz, 1H), 1.89 – 1.78 (m, 2H). <sup>13</sup>C NMR (101 MHz, Chloroform-*d*) δ 156.3, 142.0, 140.2, 129.6, 129.3, 128.4, 128.2, 127.7, 126.4, 123.9, 119.7, 117.3, 85.1, 74.3, 35.1, 29.7. HRMS (EI<sup>+</sup>) calcd for C<sub>16</sub>H<sub>16</sub>O<sub>2</sub> (M<sup>+</sup>) 240.1145; found, 240.1146.

5-bromo-2-(1,3,4,5-tetrahydrobenzo[*c*]oxepin-1-yl)phenol (**3ma**)

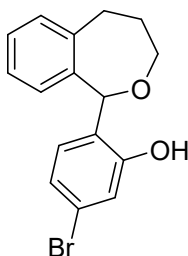

Yellow oil (83% yield). <sup>1</sup>H NMR (400 MHz, Chloroform-*d*) δ 8.03 (s, 1H), 7.24 – 7.18 (m, 2H), 7.15 (d, *J* = 2.0 Hz, 1H), 7.11 – 7.05 (m, 1H), 6.98 (dd, *J* = 8.1, 2.0 Hz, 1H), 6.71 (d, *J* = 8.1 Hz, 1H), 6.67 (d, *J* = 7.7 Hz, 1H), 5.87 (s, 1H), 4.36 (dt, *J* = 12.1, 3.5 Hz, 1H), 4.10 – 4.01 (m, 1H), 3.23 – 3.14 (m, 1H), 2.98 (ddd, *J* = 14.6, 6.5, 2.8 Hz, 1H), 1.98 – 1.84 (m, 2H). <sup>13</sup>C NMR (101 MHz, Chloroform-*d*) δ 157.2, 142.0, 139.7, 129.8, 129.5, 128.4, 127.5, 126.5, 123.1, 122.8, 122.4, 120.6, 84.7, 74.4, 35.0, 29.6. HRMS (EI<sup>+</sup>) calcd for C<sub>16</sub>H<sub>15</sub><sup>79</sup>BrO<sub>2</sub> (M<sup>+</sup>) 318.0250; found, 318.0255. HRMS (EI<sup>+</sup>) calcd for C<sub>16</sub>H<sub>15</sub><sup>81</sup>BrO<sub>2</sub> (M<sup>+</sup>) 320.0229; found, 320.0235.



7.6, 2.0 Hz, 1H), 7.00 (d,  $J = 7.5$  Hz, 1H), 6.44 (t,  $J = 2.5$  Hz, 1H), 5.26 (dd,  $J = 12.2, 2.5$  Hz, 1H), 5.12 (dd,  $J = 12.2, 2.0$  Hz, 1H).  $^{13}\text{C}$  NMR (101 MHz, Chloroform-*d*)  $\delta$  146.1, 139.5, 138.2, 134.1, 129.0, 128.8, 127.7, 127.1, 126.8, 121.2, 120.2, 120.0, 117.6 (q,  $J = 321.3$  Hz), 78.9, 72.4. HRMS (EI<sup>+</sup>) calcd for C<sub>15</sub>H<sub>11</sub>F<sub>3</sub>O<sub>4</sub>S (M<sup>+</sup>) 344.0325; found, 344.0327.

**4aa** (0.3 mmol), Pd(OAc)<sub>2</sub> (0.1 equiv.), dcype (0.2 equiv.), Rb<sub>2</sub>CO<sub>3</sub> (1.5 equiv.), and CsOPiv (1.0 equiv.) were added in a reaction tube with toluene (1.5 mL), and the mixture was stirred at 120 °C for 16 h. The reaction was quenched with saturated NaCl (aq) and extracted with ethyl acetate, dried over MgSO<sub>4</sub>, filtered, and concentrated under vacuum. The residue was chromatographed on silica gel with Petroleum ether/ ethyl acetate (50:1) to afford **5aa** a pale yellow oil (73% yield).  $^1\text{H}$  NMR (400 MHz, Chloroform-*d*)  $\delta$  7.63 (d,  $J = 7.5$  Hz, 1H), 7.59 (d,  $J = 7.5$  Hz, 1H), 7.38 – 7.33 (m, 2H), 7.27 – 7.18 (m, 2H), 7.07 (d,  $J = 7.2$  Hz, 1H), 6.04 (d,  $J = 2.5$  Hz, 1H), 5.63 (dd,  $J = 11.6, 2.5$  Hz, 1H), 4.99 (d,  $J = 11.6$  Hz, 1H).  $^{13}\text{C}$  NMR (101 MHz, Chloroform-*d*)  $\delta$  158.1, 148.6, 145.7, 141.6, 139.3, 130.5, 129.3, 126.8, 126.7, 122.1, 121.4, 120.4, 86.3, 78.8. HRMS (EI<sup>+</sup>) calcd for C<sub>14</sub>H<sub>10</sub>O (M<sup>+</sup>) 194.0727; found, 194.0726.

3,10b-dihydro-2*H*-indeno[1,2,3-*ij*]isochromene (**5ia**)

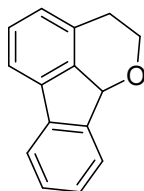

White solid (91% yield). M.p.: 122.3-123.8°C.  $^1\text{H}$  NMR (400 MHz, Chloroform-*d*)  $\delta$  7.63 (d,  $J = 7.5$  Hz, 2H), 7.43 (d,  $J = 7.5$  Hz, 1H), 7.35 (t,  $J = 7.5$  Hz, 1H), 7.30 – 7.22 (m, 2H), 7.00 (d,  $J = 7.5$  Hz, 1H), 5.25 (s, 1H), 4.32 – 4.24 (m, 2H), 2.90 (t,  $J = 6.4$  Hz, 2H).  $^{13}\text{C}$  NMR (101 MHz, Chloroform-*d*)  $\delta$  145.3, 143.8, 141.3, 138.6, 132.2, 129.5, 129.1, 127.4, 125.9, 125.3, 121.2, 118.3, 79.2, 67.0, 26.7. HRMS (EI<sup>+</sup>) calcd for C<sub>15</sub>H<sub>12</sub>O (M<sup>+</sup>) 208.0883; found, 208.0885.

2,3,4,11b-tetrahydrofluoreno[9,1-*bc*]oxepine (**5la**)

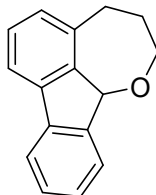

White solid (88% yield). M.p.: 103.4-104.8°C.  $^1\text{H}$  NMR (400 MHz, Chloroform-*d*)  $\delta$  7.67 – 7.57 (m, 2H), 7.50 (d,  $J = 7.4$  Hz, 1H), 7.37 (t,  $J = 7.4$  Hz, 1H), 7.30 (t,  $J = 7.4$  Hz, 1H), 7.25 (t,  $J = 7.4$  Hz, 1H), 7.06 (d,  $J = 7.4$  Hz, 1H), 5.34 (s, 1H), 4.53 (dt,  $J = 12.3, 3.0$  Hz, 1H), 4.09 (t,  $J = 11.2$  Hz, 1H), 3.22 – 3.10 (m, 1H), 2.94 (dd,  $J = 14.8, 4.4$  Hz, 1H), 2.01 – 1.85 (m, 2H).  $^{13}\text{C}$  NMR (101 MHz, Chloroform-*d*)  $\delta$  145.2, 143.4, 140.6, 140.6, 140.1, 129.1, 128.8, 127.6, 127.3, 125.5, 120.1, 117.9, 83.9, 75.7, 35.4, 30.9. HRMS (EI<sup>+</sup>) calcd for C<sub>16</sub>H<sub>14</sub>O (M<sup>+</sup>) 222.1039; found, 222.1041.

## 4. X-ray Crystallographic Data

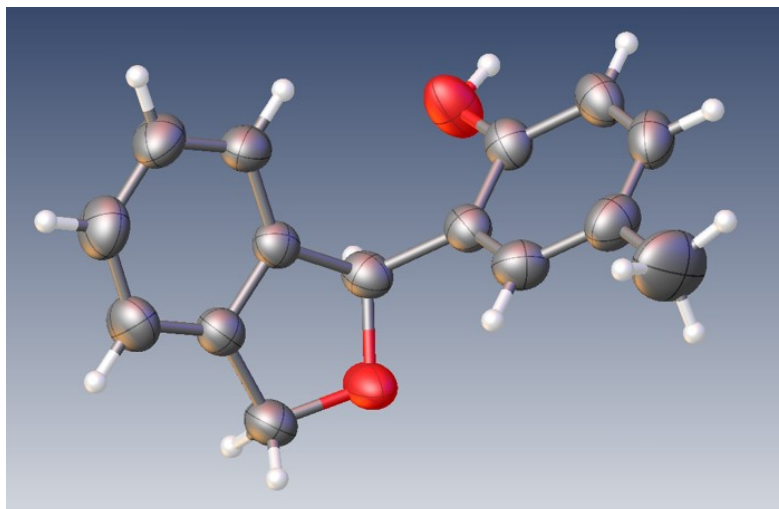

Figure S1: XRAY structure of 2-(1,3-dihydroisobenzofuran-1-yl)-4-methylphenol (**3ac**) (CCDC 2484228)

**Preparation for Crystal Growth.** The compound **3ac** was dissolved in minimum amount of chloroform/ethyl acetate (1:1) and kept at room temperature for slow evaporation (7 days). Crystal was formed which was subjected to X-ray diffraction analysis.

| Table S1: Crystal data and structure refinement for <b>3ac</b> . |                                                |
|------------------------------------------------------------------|------------------------------------------------|
| Identification code                                              | YXN3_0m_a                                      |
| Empirical formula                                                | C <sub>15</sub> H <sub>14</sub> O <sub>2</sub> |
| Formula weight                                                   | 226.26                                         |
| Temperature/K                                                    | 273.15                                         |
| Crystal system                                                   | monoclinic                                     |
| Space group                                                      | P2 <sub>1</sub> /n                             |
| a/Å                                                              | 8.3110(2)                                      |
| b/Å                                                              | 16.9374(4)                                     |
| c/Å                                                              | 8.9160(2)                                      |
| α/°                                                              | 90                                             |
| β/°                                                              | 103.7360(10)                                   |
| γ/°                                                              | 90                                             |
| Volume/Å <sup>3</sup>                                            | 1219.18(5)                                     |
| Z                                                                | 4                                              |
| ρ <sub>calc</sub> /cm <sup>3</sup>                               | 1.233                                          |
| μ/mm <sup>-1</sup>                                               | 0.645                                          |
| F(000)                                                           | 480.0                                          |
| Crystal size/mm <sup>3</sup>                                     | 0.25 × 0.24 × 0.24                             |
| Radiation                                                        | CuKα (λ = 1.54178)                             |
| 2θ range for data collection/°                                   | 10.446 to 136.95                               |
| Index ranges                                                     | -10 ≤ h ≤ 9, -19 ≤ k ≤ 19, -10 ≤ l ≤ 10        |

|                                                |                                                                  |
|------------------------------------------------|------------------------------------------------------------------|
| Reflections collected                          | 17180                                                            |
| Independent reflections                        | 2202 [ $R_{\text{int}} = 0.0469$ , $R_{\text{sigma}} = 0.0342$ ] |
| Data/restraints/parameters                     | 2202/0/157                                                       |
| Goodness-of-fit on $F^2$                       | 1.074                                                            |
| Final R indexes [ $I \geq 2\sigma(I)$ ]        | $R_1 = 0.0458$ , $wR_2 = 0.1169$                                 |
| Final R indexes [all data]                     | $R_1 = 0.0482$ , $wR_2 = 0.1190$                                 |
| Largest diff. peak/hole / $e \text{ \AA}^{-3}$ | 0.22/-0.17                                                       |









### <sup>1</sup>H NMR (400 MHz, Chloroform-*d*) of 3af

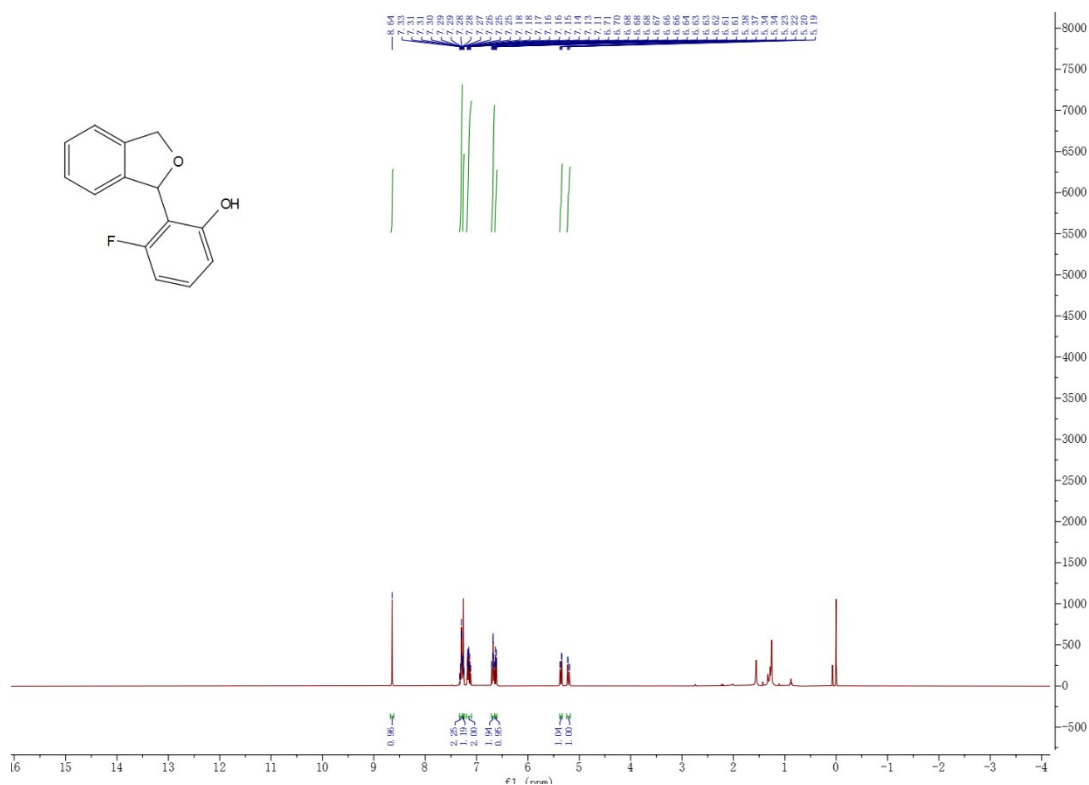

### <sup>13</sup>C NMR (101 MHz, Chloroform-*d*) of 3af

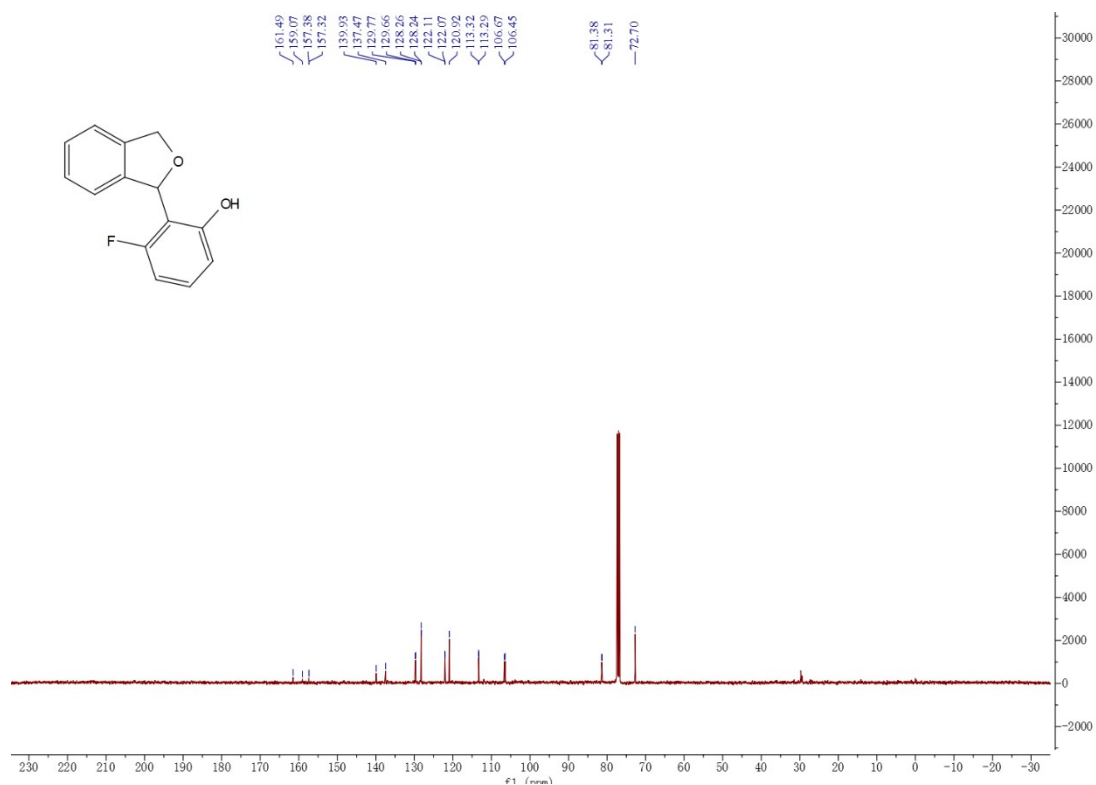

**<sup>19</sup>F NMR (376 MHz, Chloroform-*d*) of 3af**

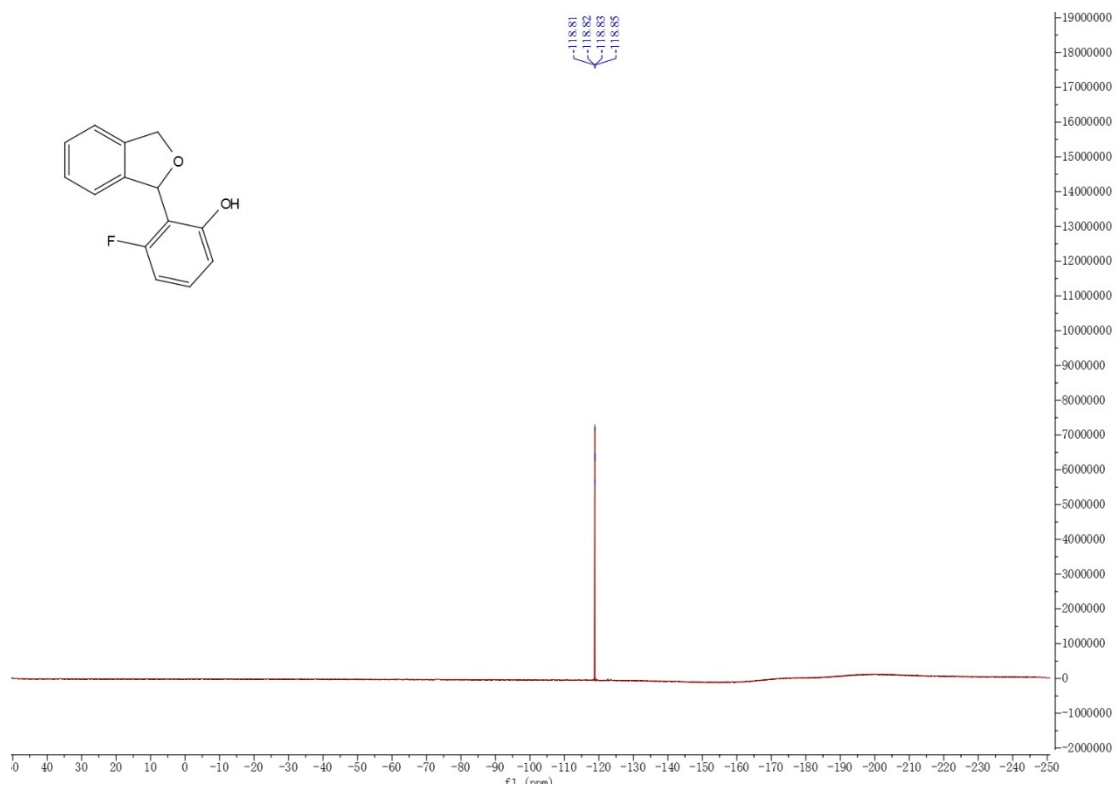

### <sup>1</sup>H NMR (400 MHz, Chloroform-*d*) of 3ag

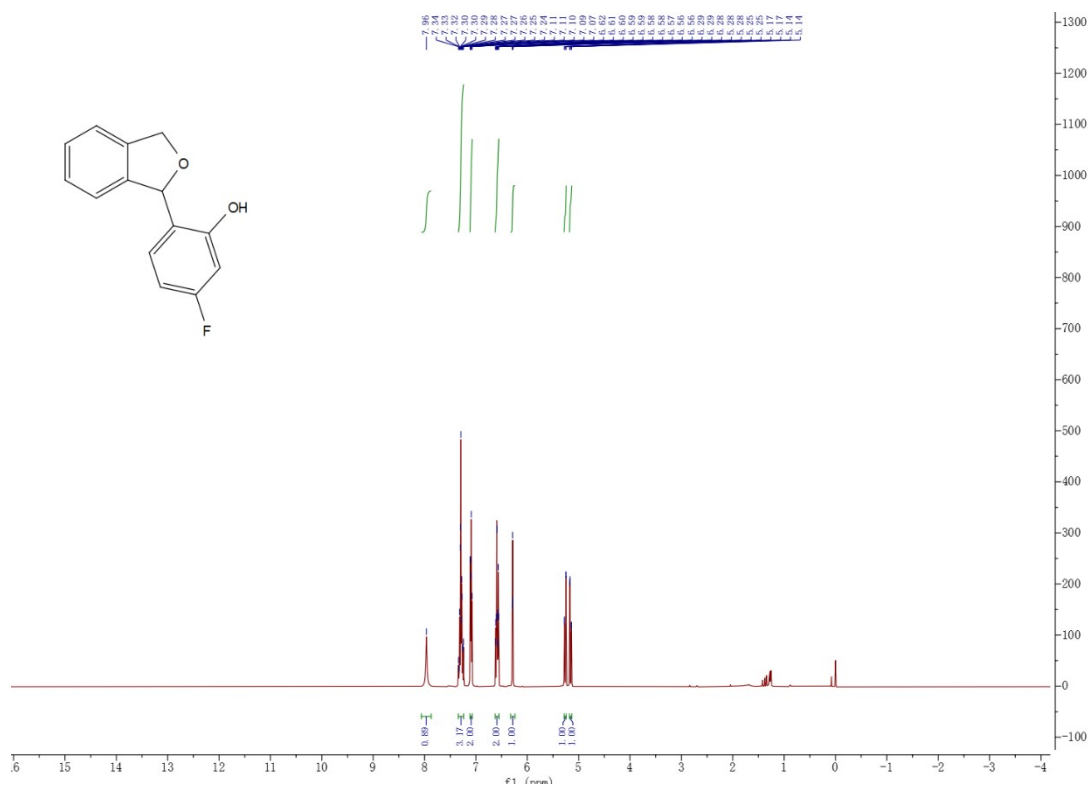

**<sup>19</sup>F NMR (376 MHz, Chloroform-*d*) of 3ag**

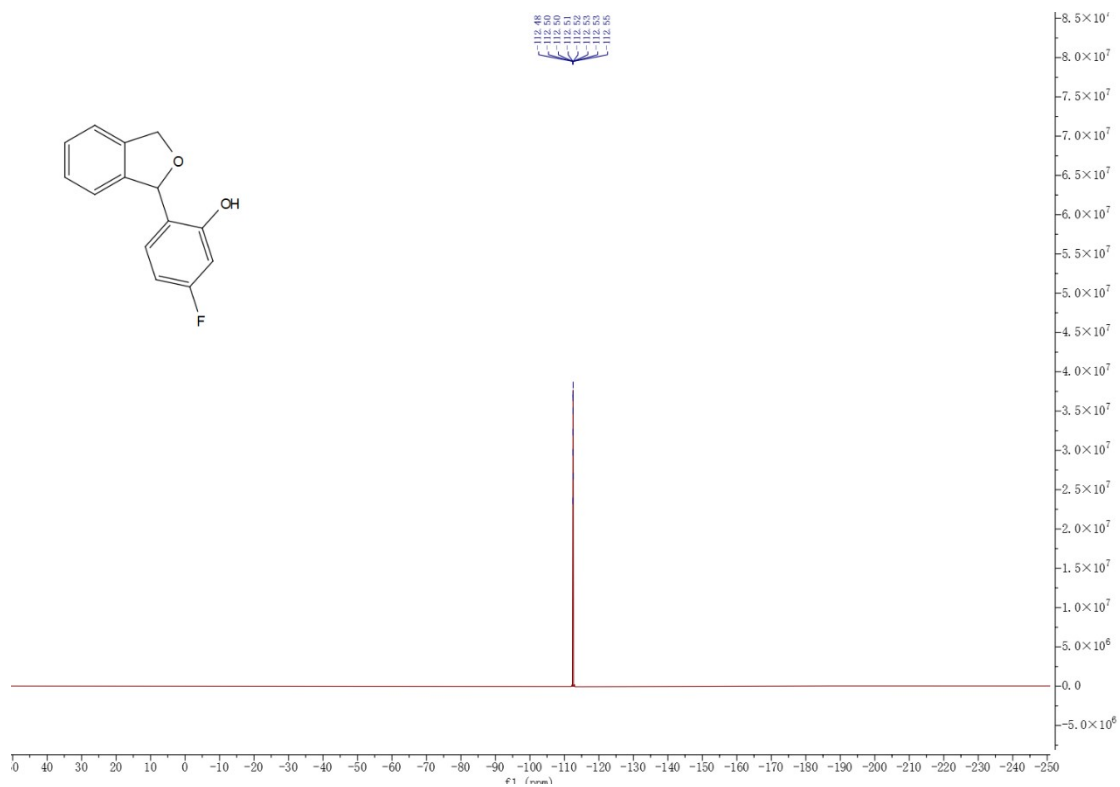

**<sup>1</sup>H NMR (400 MHz, Chloroform-*d*) of 3ah**

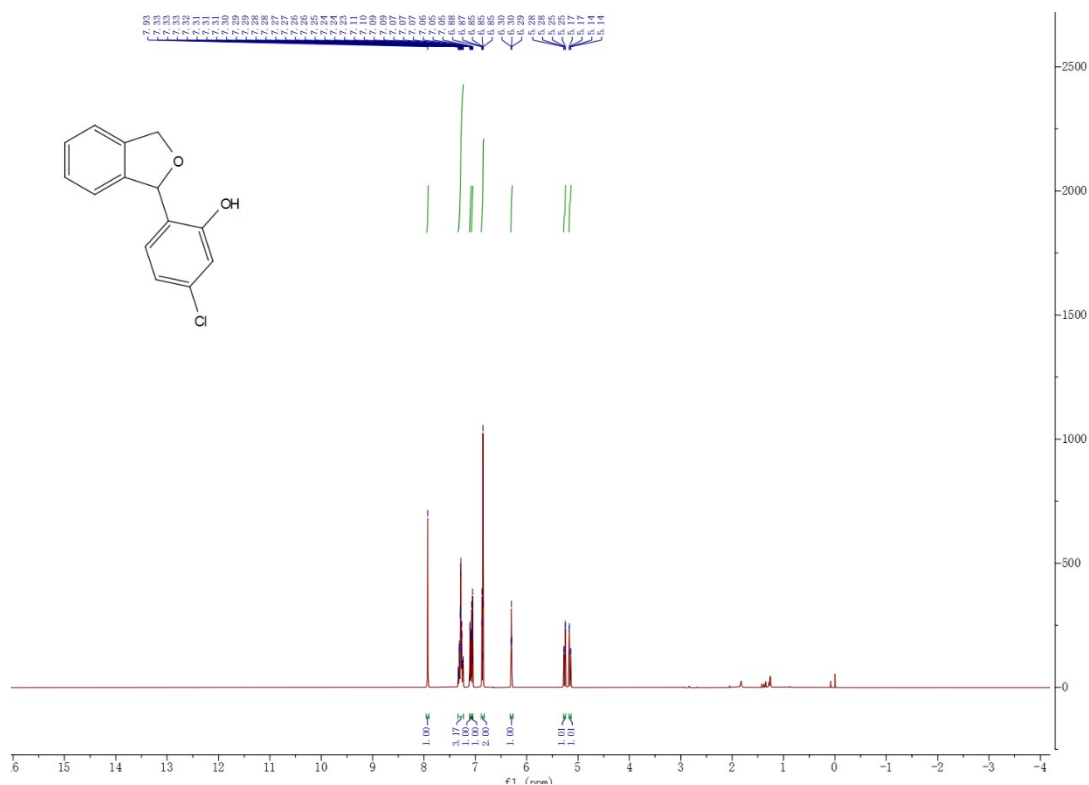

**<sup>13</sup>C NMR (101 MHz, Chloroform-*d*) of 3ah**

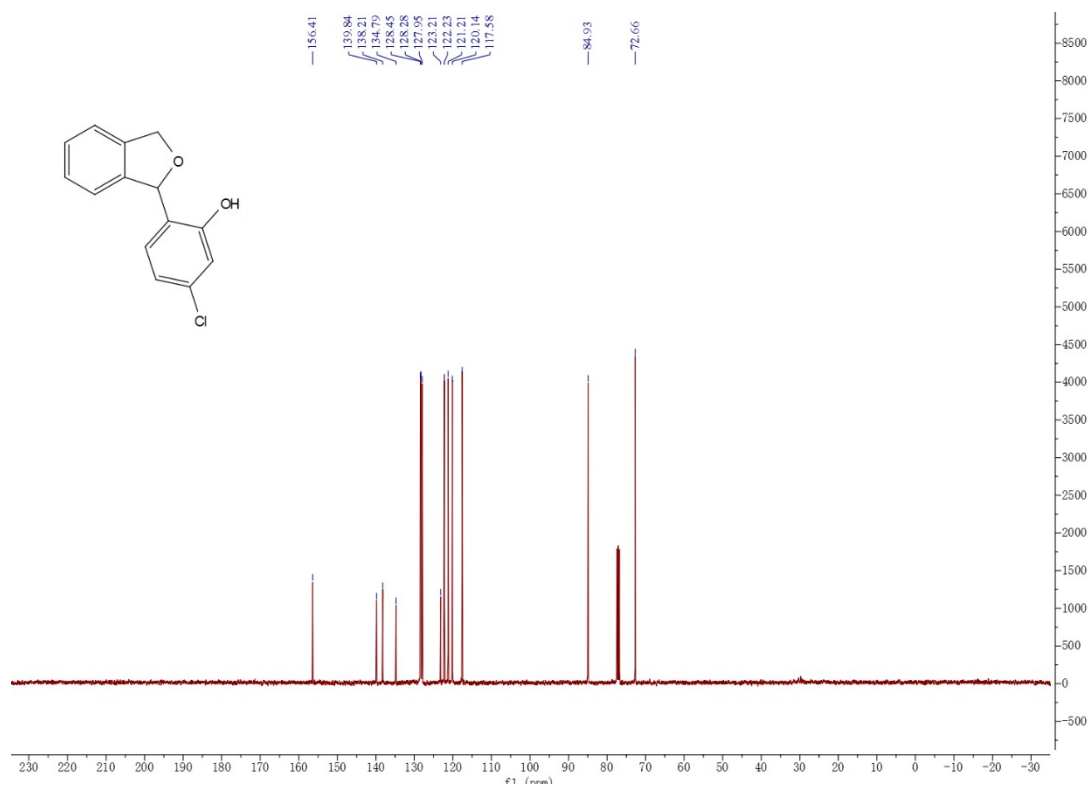

**<sup>1</sup>H NMR (400 MHz, Chloroform-*d*) of 3ai**

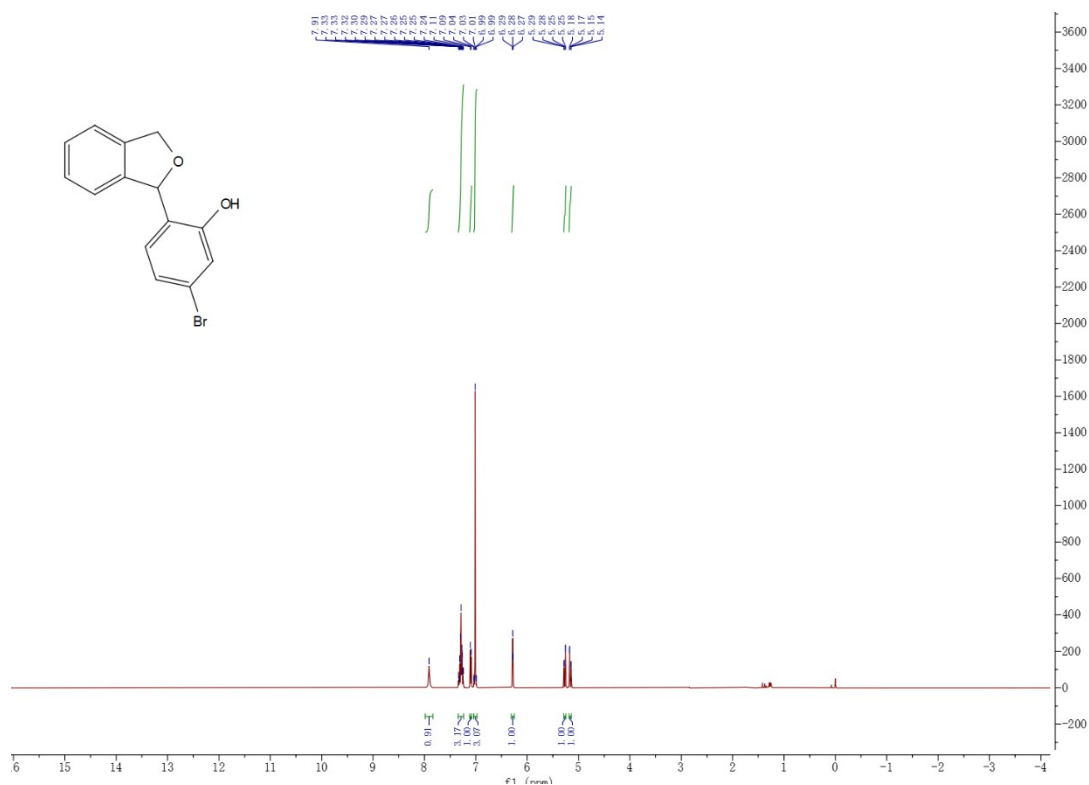

### <sup>1</sup>H NMR (400 MHz, Chloroform-*d*) of 3aj

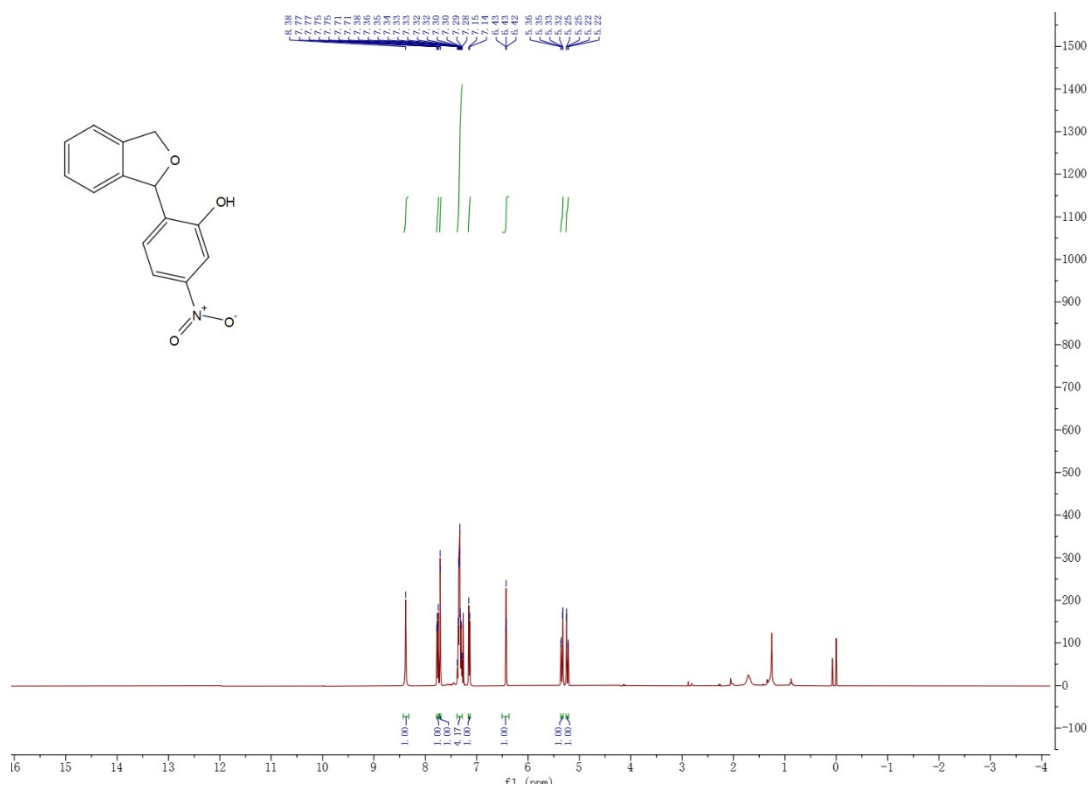



### <sup>1</sup>H NMR (400 MHz, Chloroform-*d*) of 3a

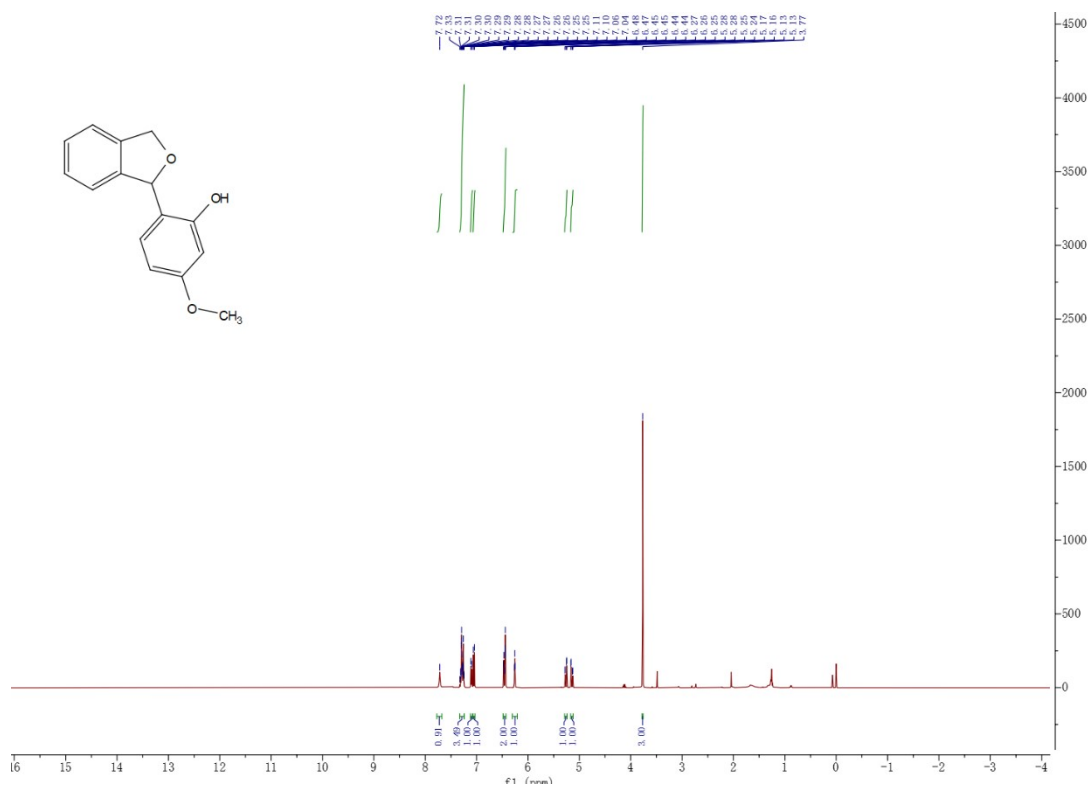

### <sup>13</sup>C NMR (101 MHz, Chloroform-*d*) of 3a

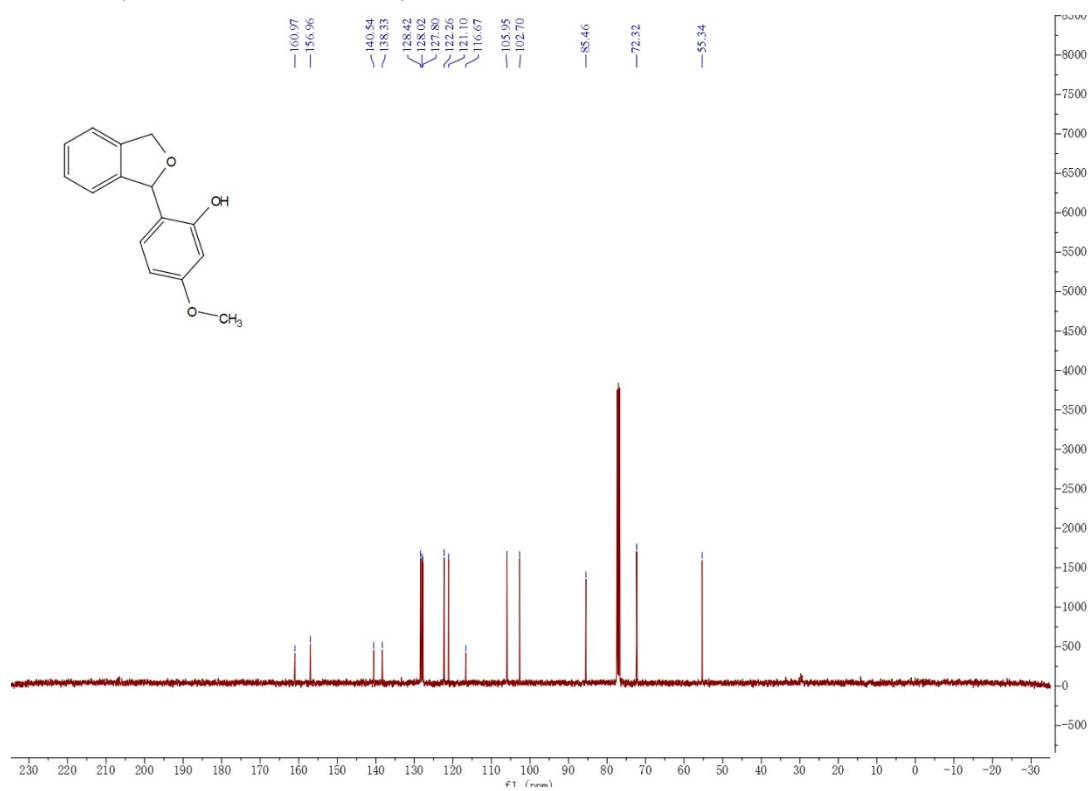





**<sup>1</sup>H NMR (400 MHz, DMSO-d<sub>6</sub>) of 3ao**

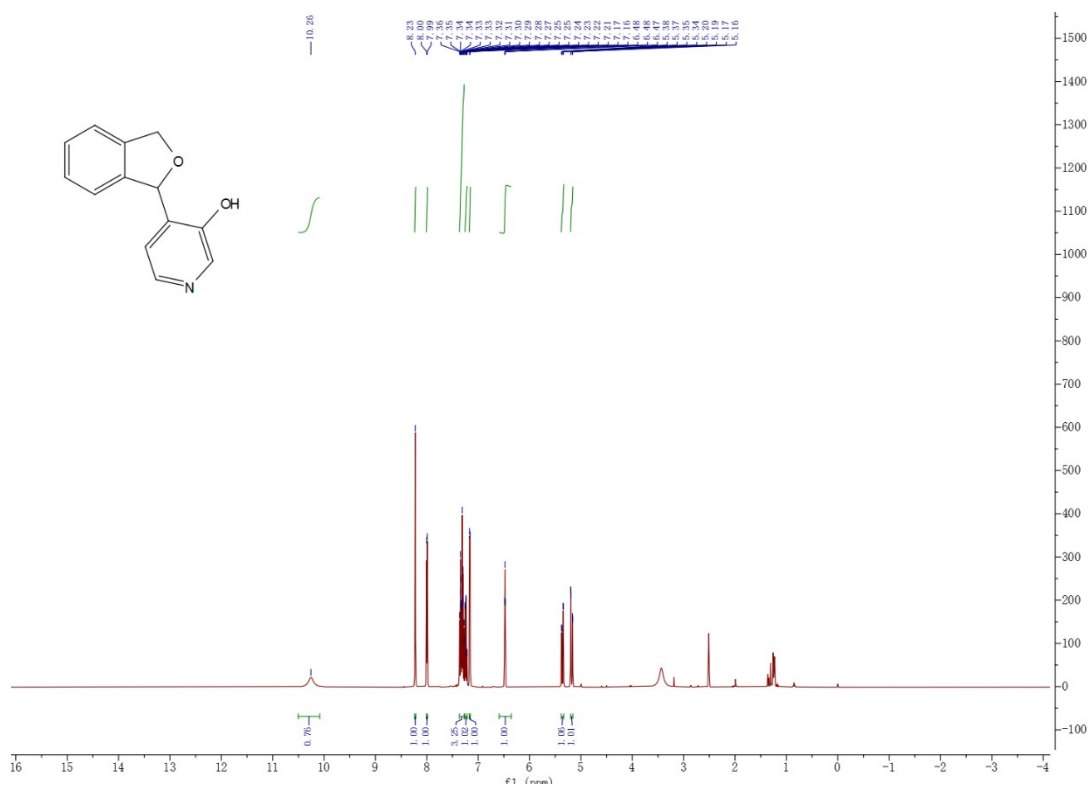

**<sup>13</sup>C NMR (101 MHz, DMSO-d<sub>6</sub>) of 3ao**

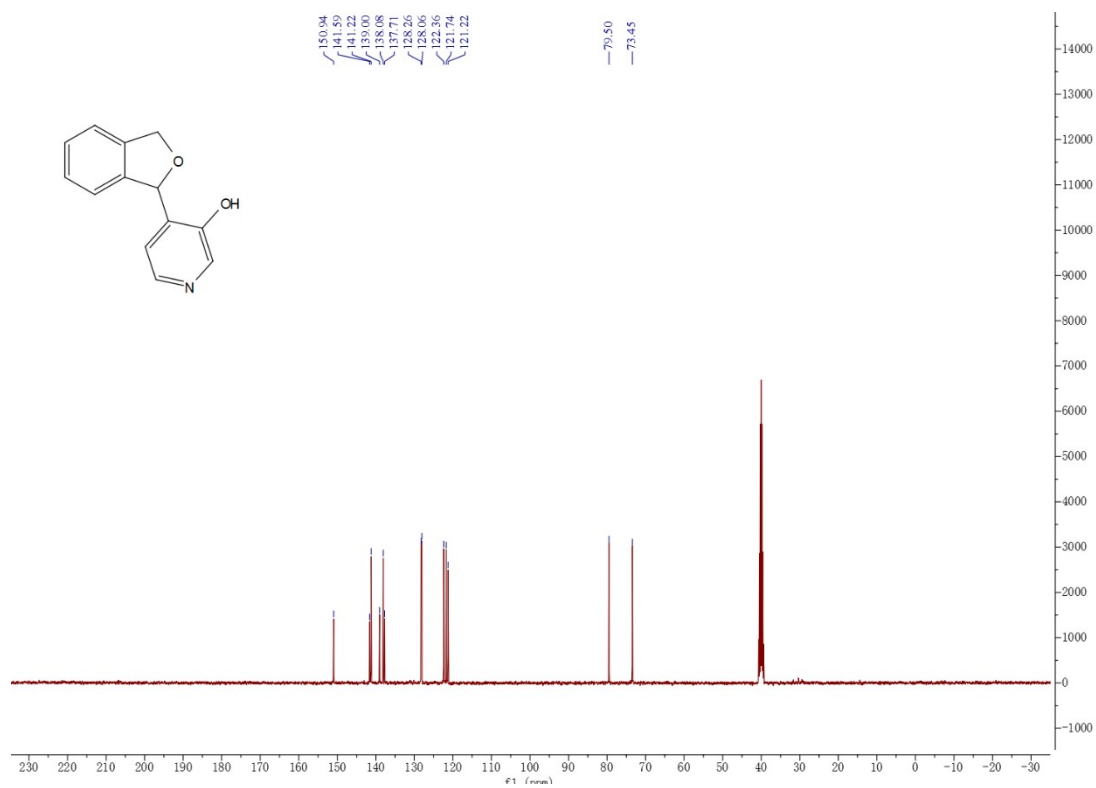



**<sup>19</sup>F NMR (376 MHz, Chloroform-*d*) of 3ba**

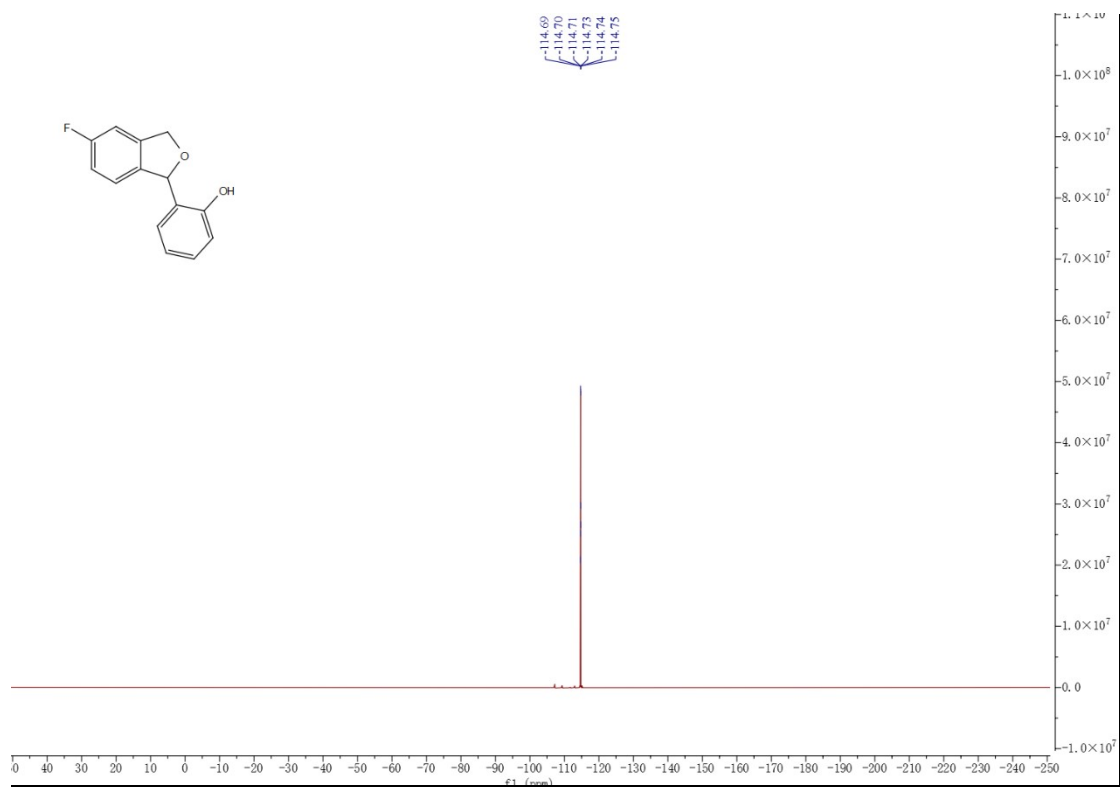

### <sup>1</sup>H NMR (400 MHz, Chloroform-*d*) of 3ca

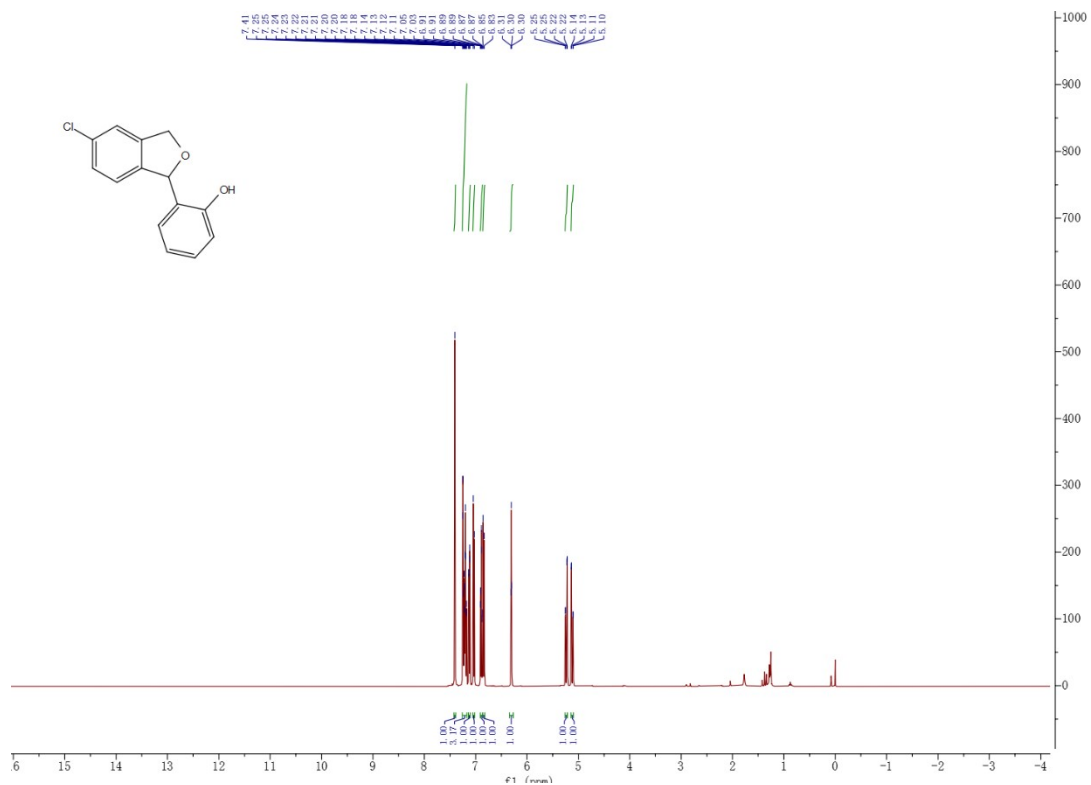

### <sup>13</sup>C NMR (101 MHz, Chloroform-*d*) of 3ca

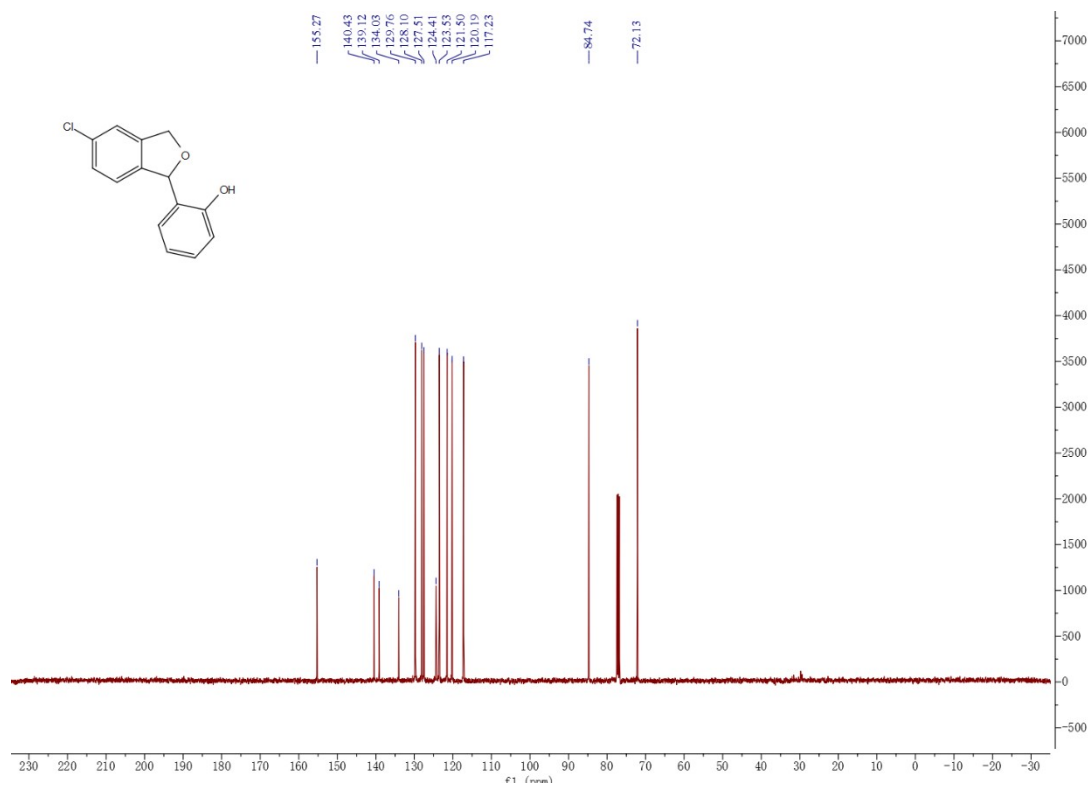

**<sup>1</sup>H NMR (400 MHz, Chloroform-*d*) of 3da**

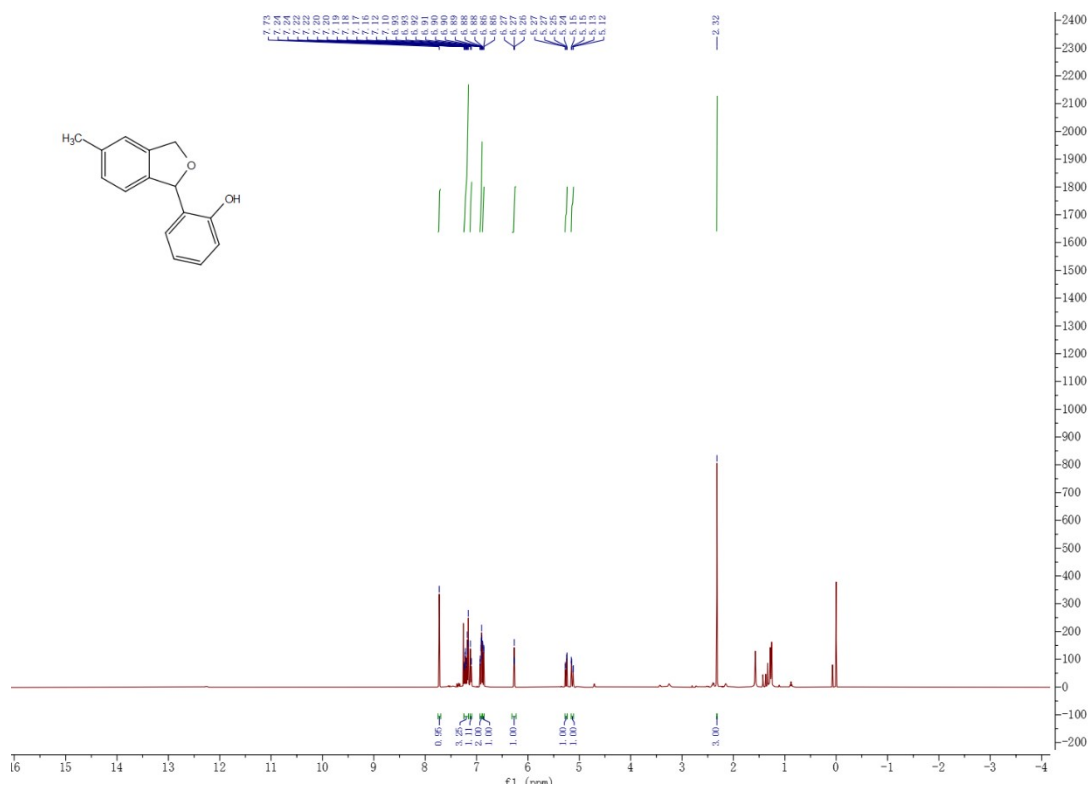

**<sup>13</sup>C NMR (101 MHz, Chloroform-*d*) of 3da**

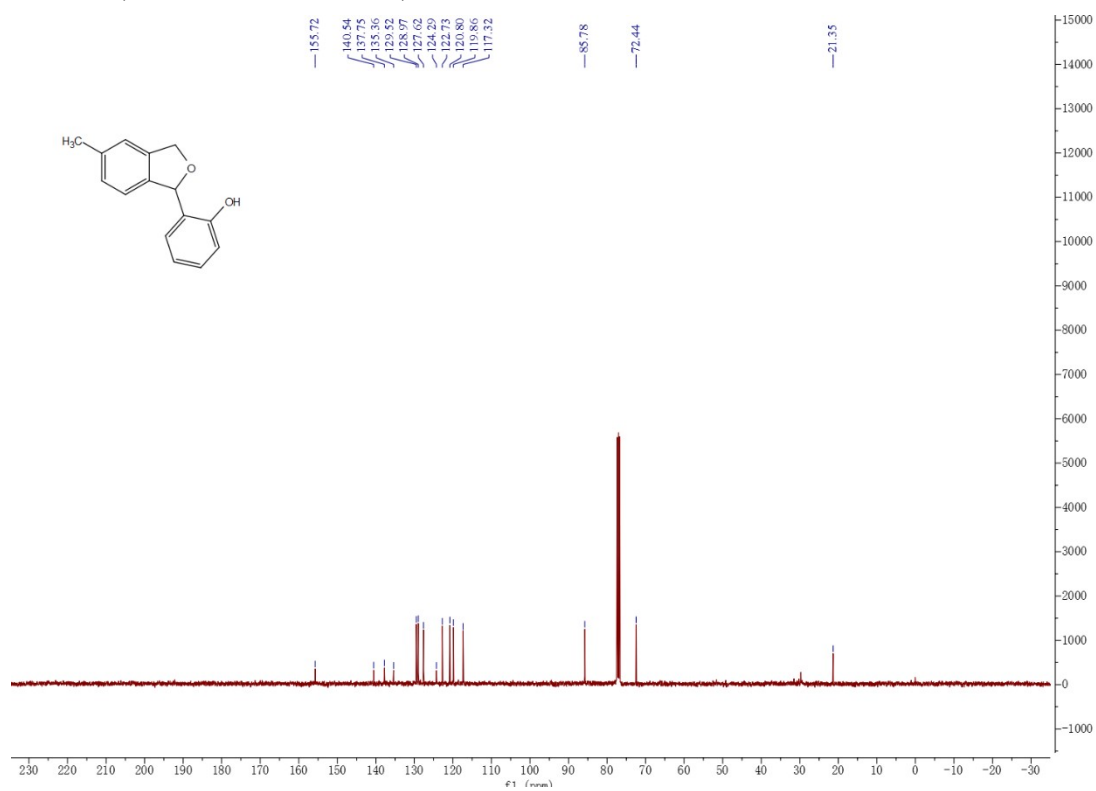

**<sup>1</sup>H NMR (400 MHz, Chloroform-*d*) of 3ea**

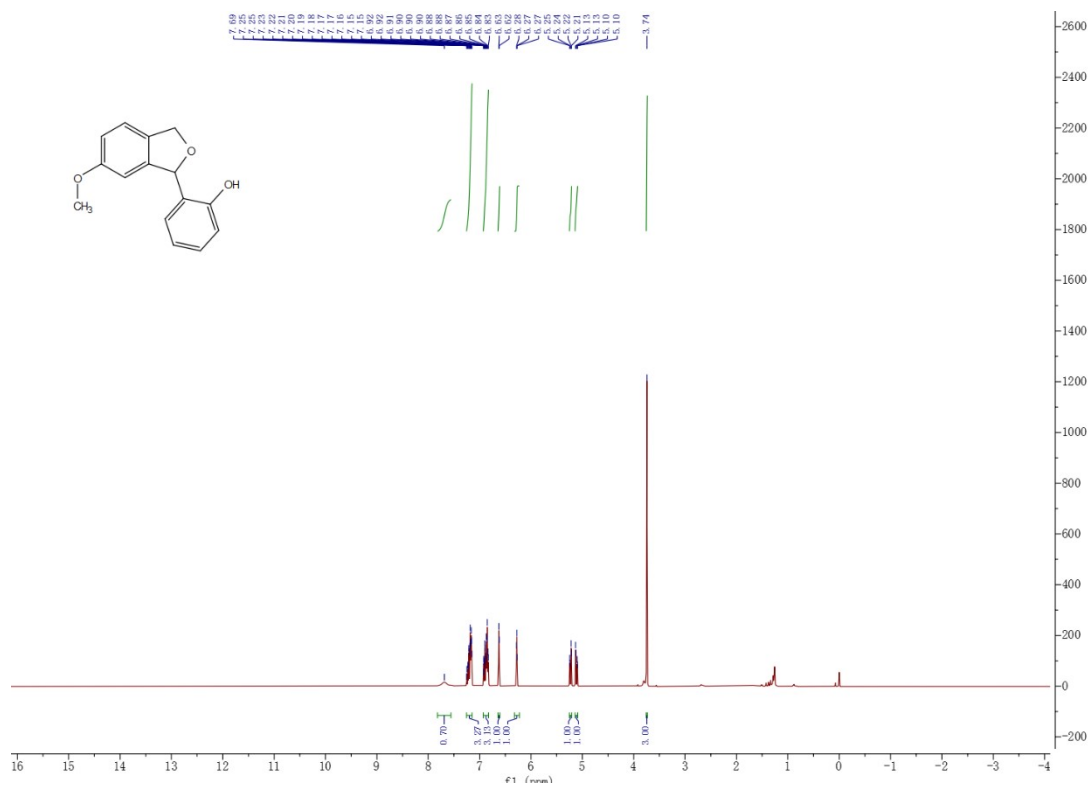

**<sup>13</sup>C NMR (101 MHz, Chloroform-*d*) of 3ea**

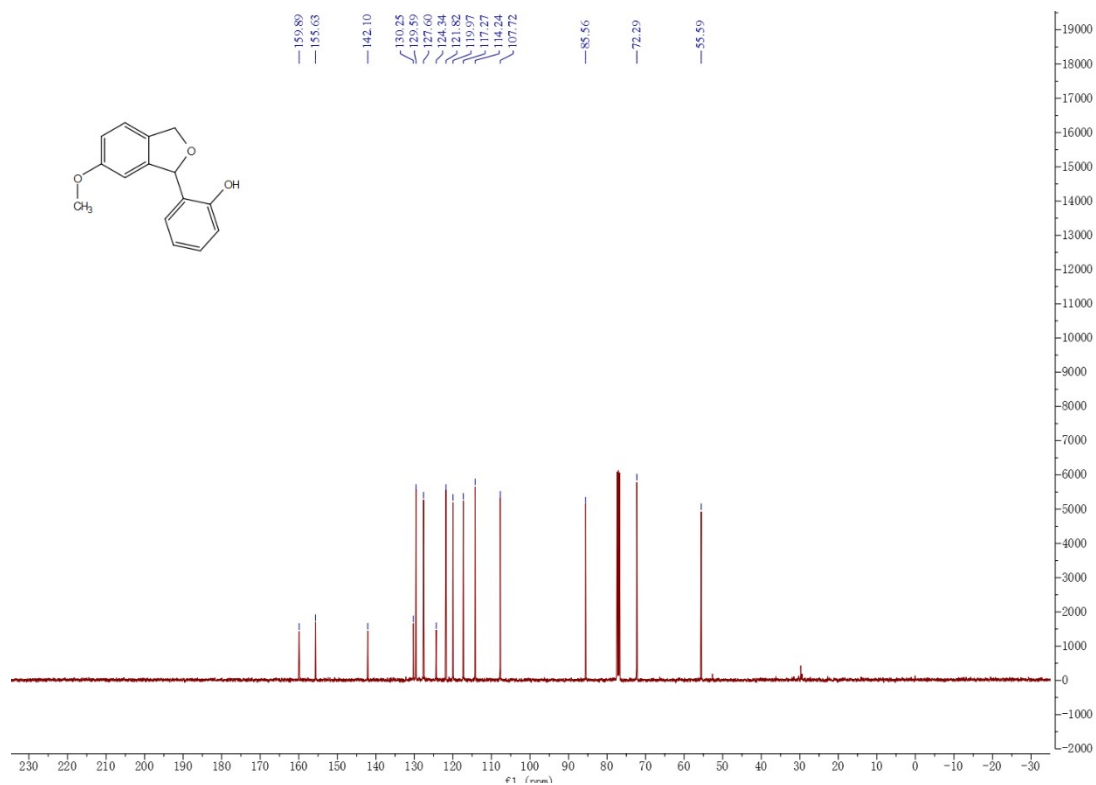

### <sup>1</sup>H NMR (400 MHz, Chloroform-*d*) of 3fa

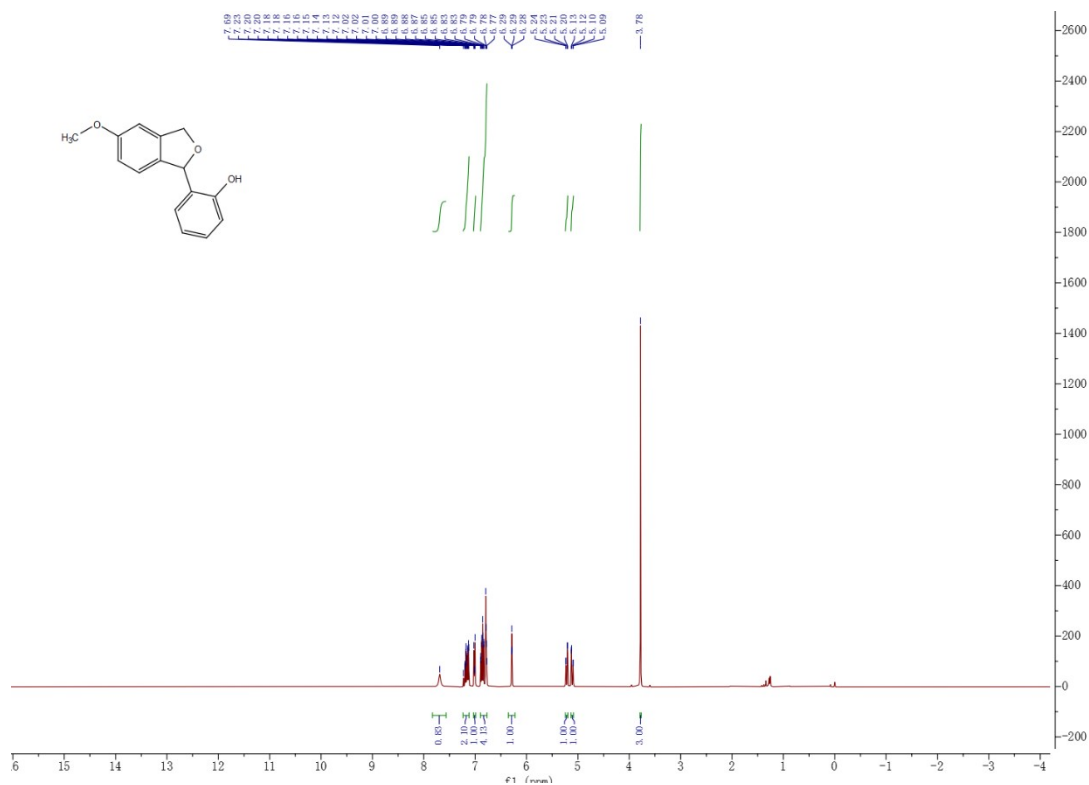

### <sup>13</sup>C NMR (101 MHz, Chloroform-*d*) of 3fa

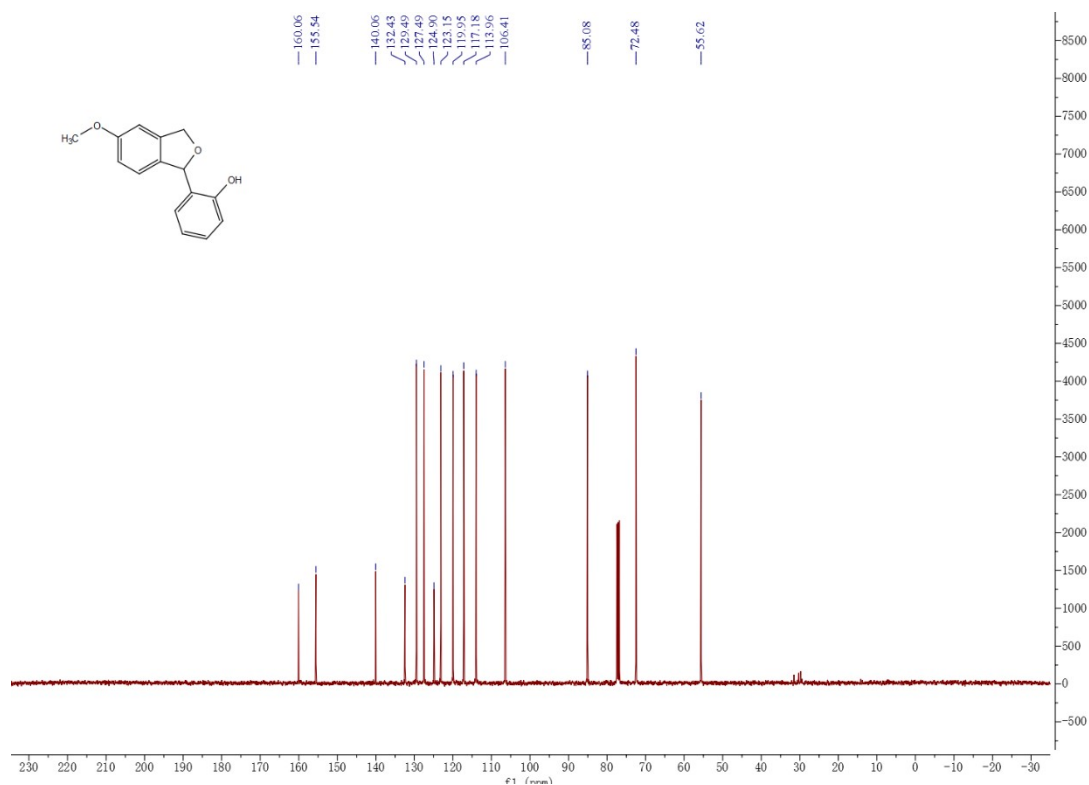







**<sup>1</sup>H NMR (400 MHz, Chloroform-*d*) of 3ja**

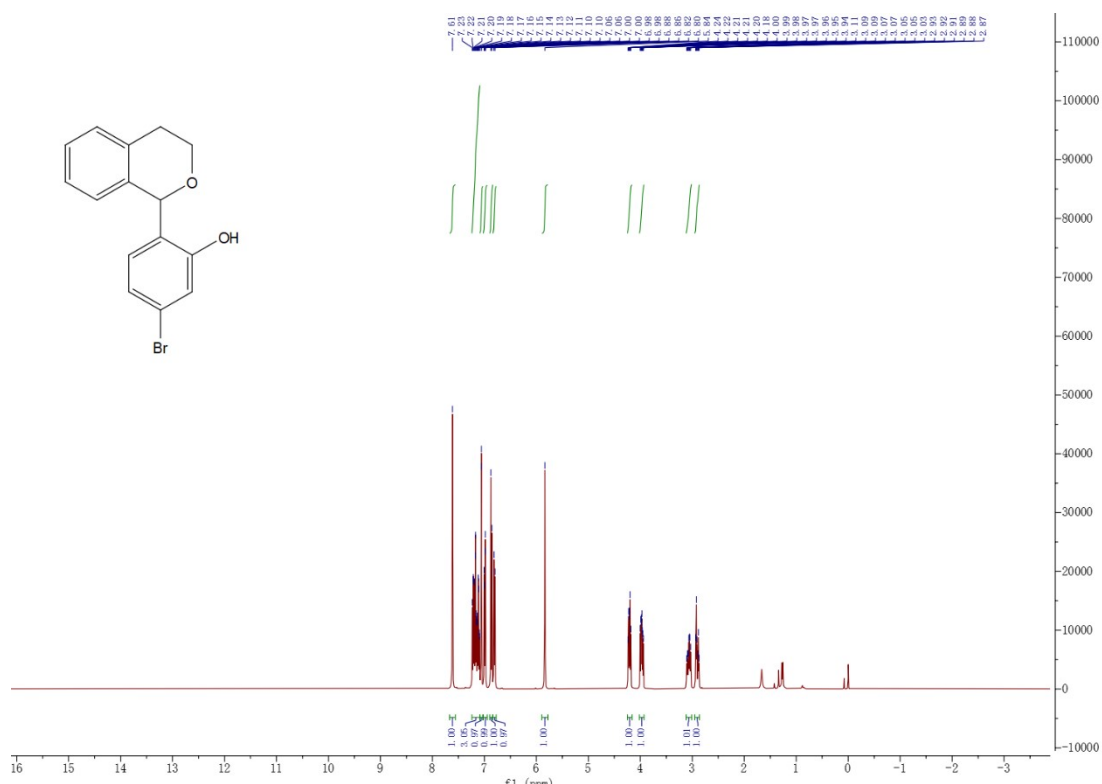

**<sup>13</sup>C NMR (101 MHz, Chloroform-*d*) of 3ja**

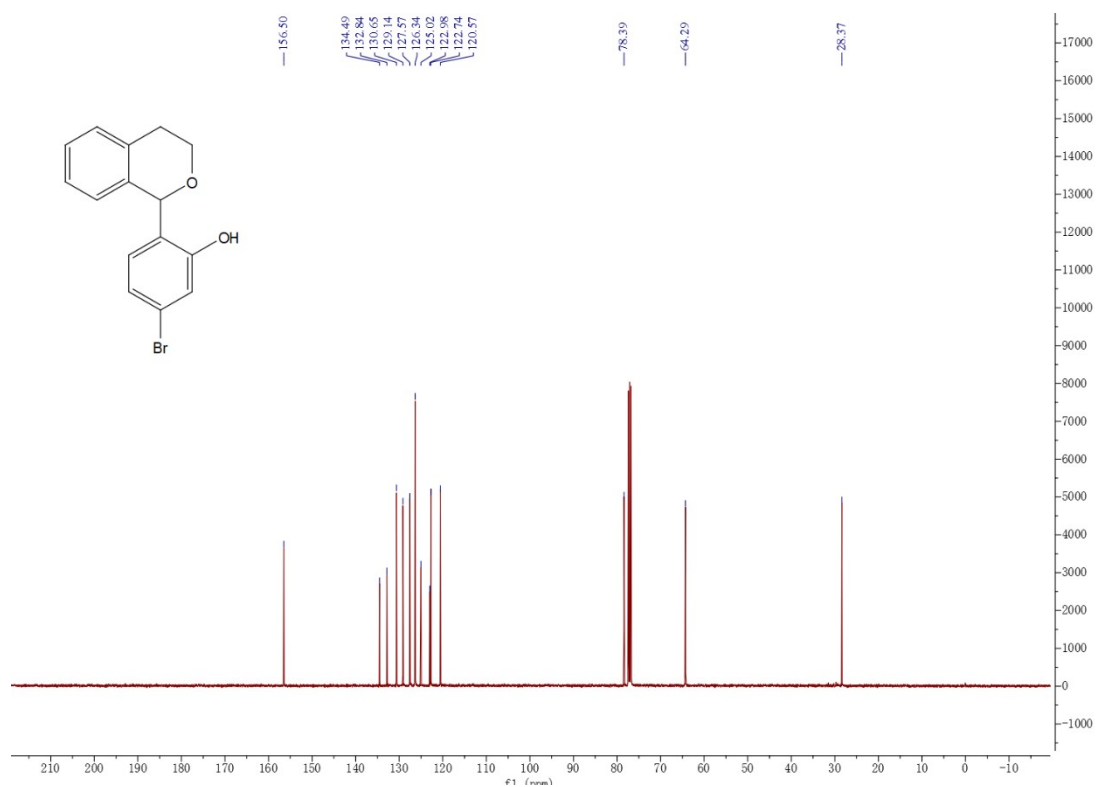

### <sup>1</sup>H NMR (400 MHz, Chloroform-*d*) of 3ka

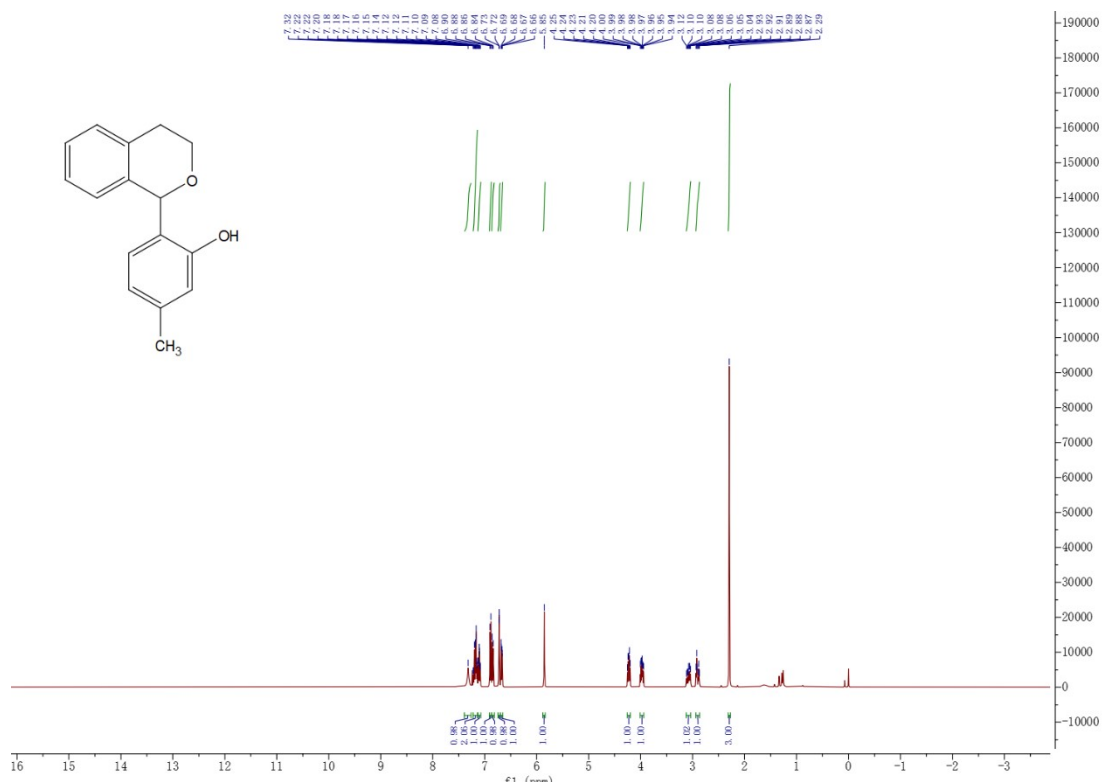

### <sup>13</sup>C NMR (101 MHz, Chloroform-*d*) of 3ka

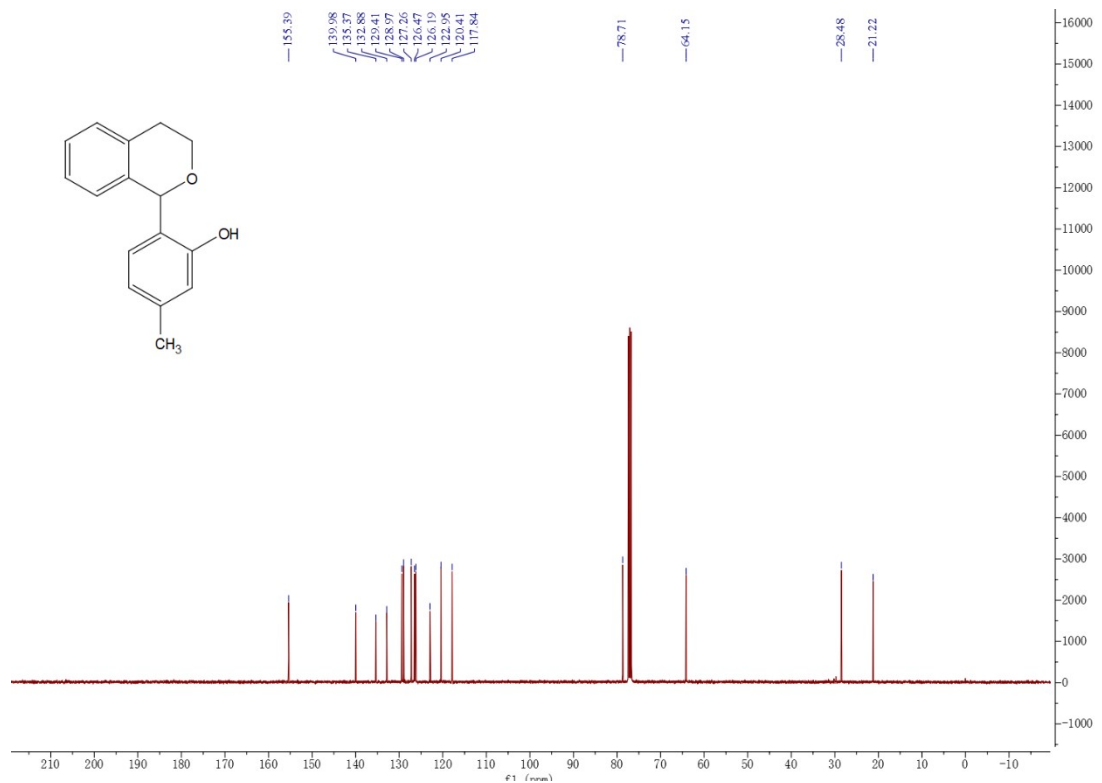



**<sup>1</sup>H NMR (400 MHz, Chloroform-*d*) of 3ma**

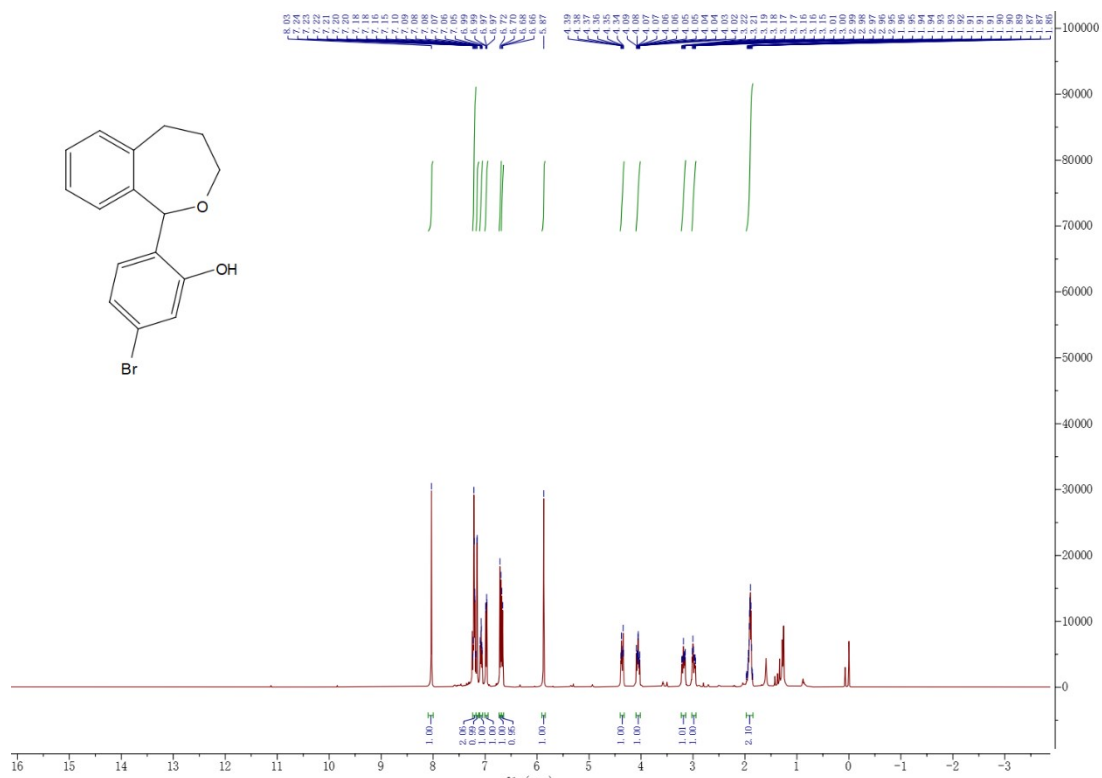

**<sup>13</sup>C NMR (101 MHz, Chloroform-*d*) of 3ma**

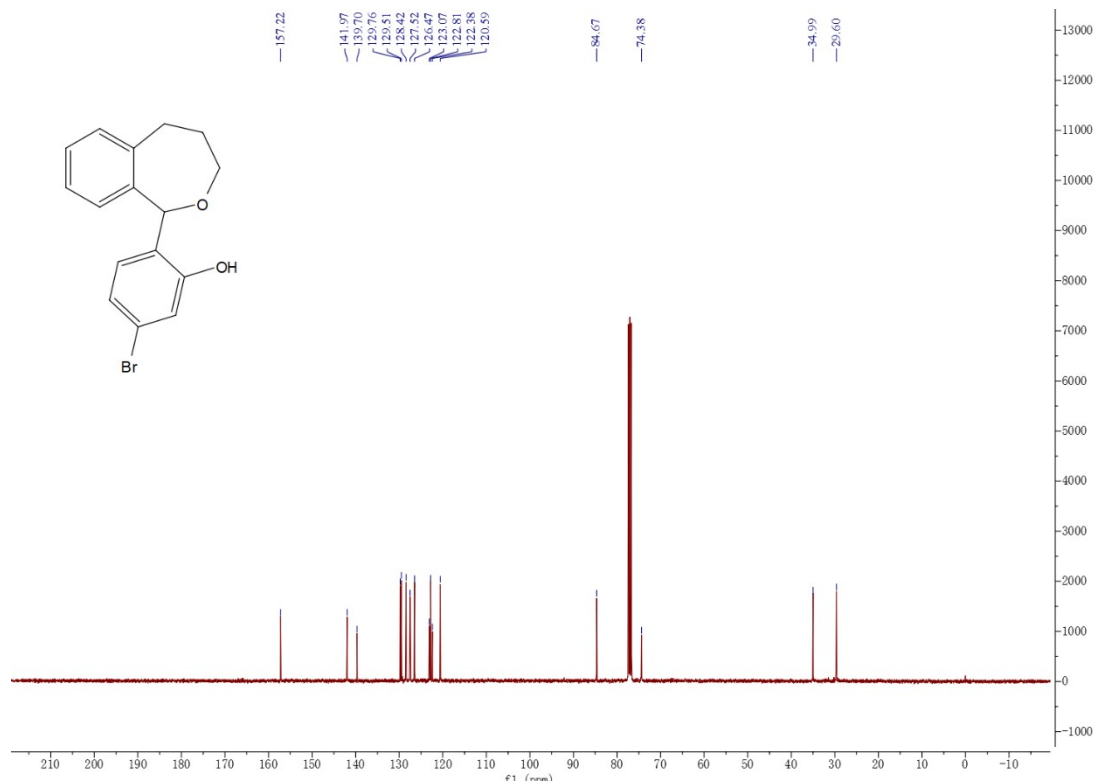

### <sup>1</sup>H NMR (400 MHz, Chloroform-*d*) of 3na

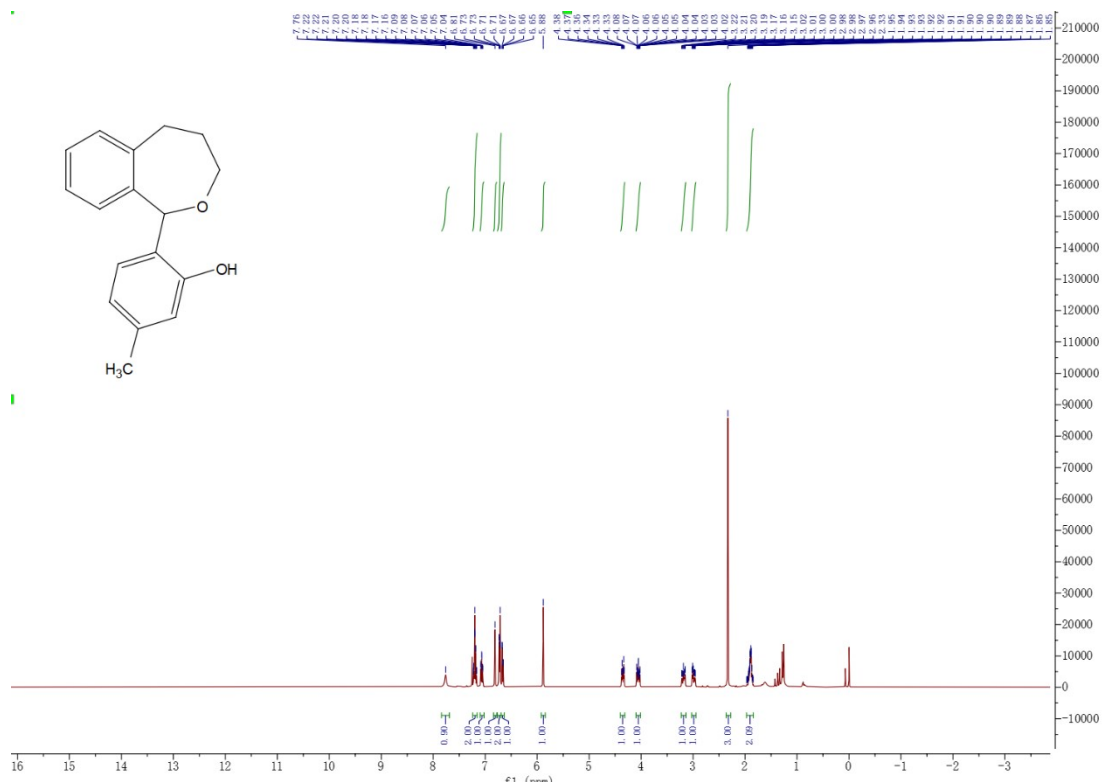

### <sup>1</sup>H NMR (400 MHz, Chloroform-*d*) of 4aa

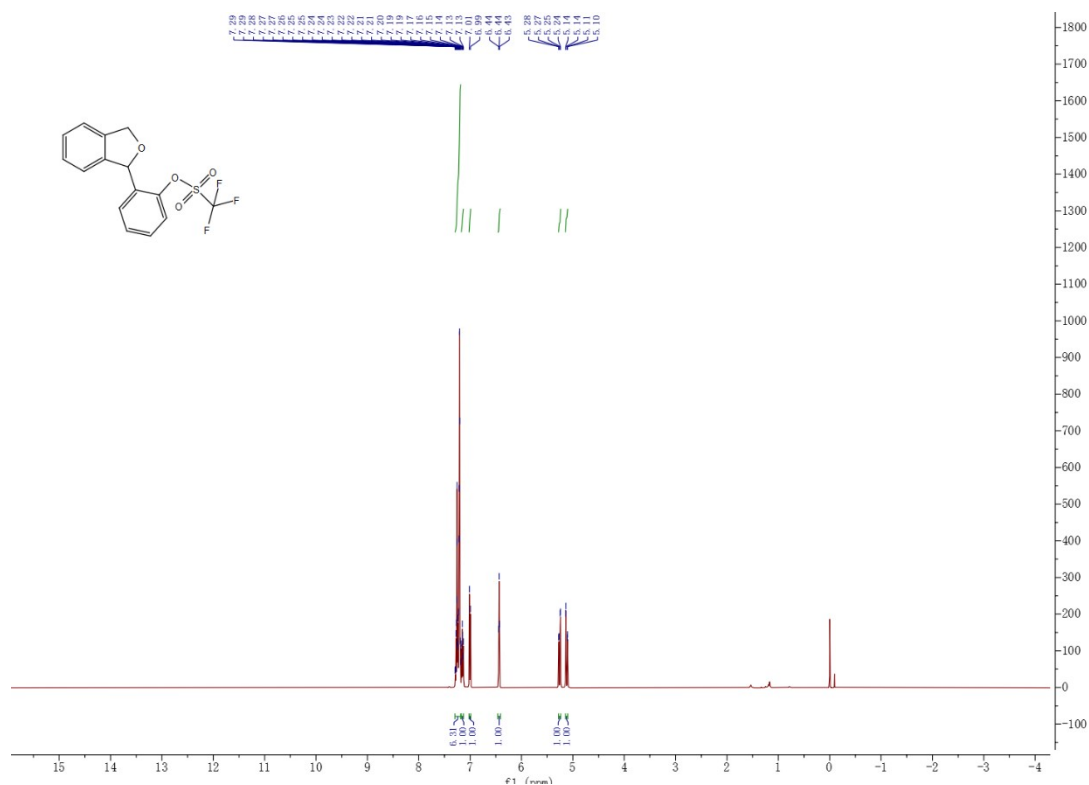

### <sup>13</sup>C NMR (101 MHz, Chloroform-*d*) of 4aa

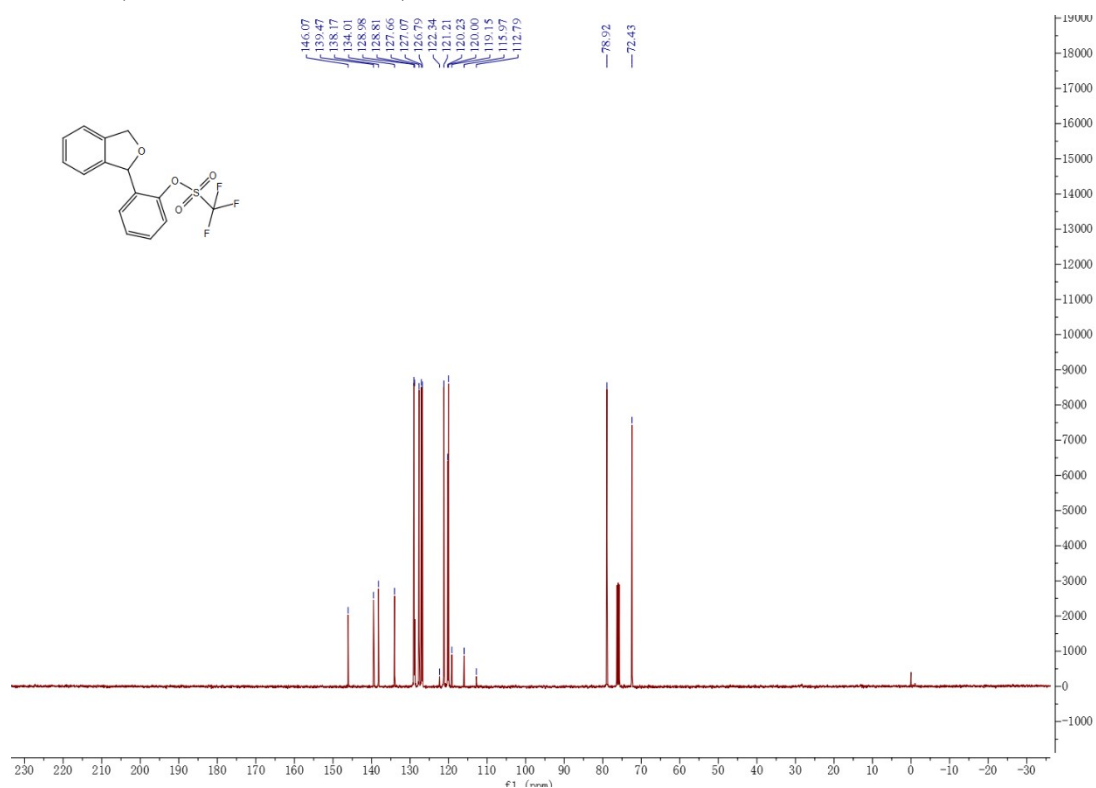

**<sup>1</sup>H NMR (400 MHz, Chloroform-*d*) of 5aa**

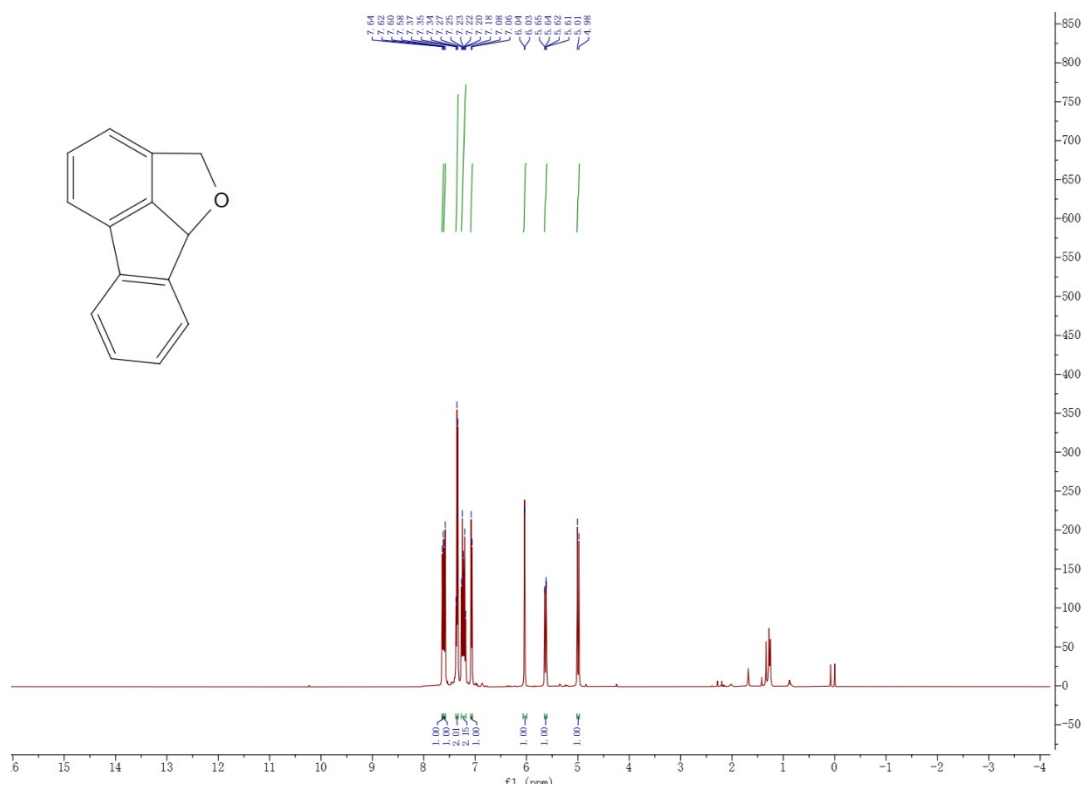

**<sup>13</sup>C NMR (101 MHz, Chloroform-*d*) of 5aa**

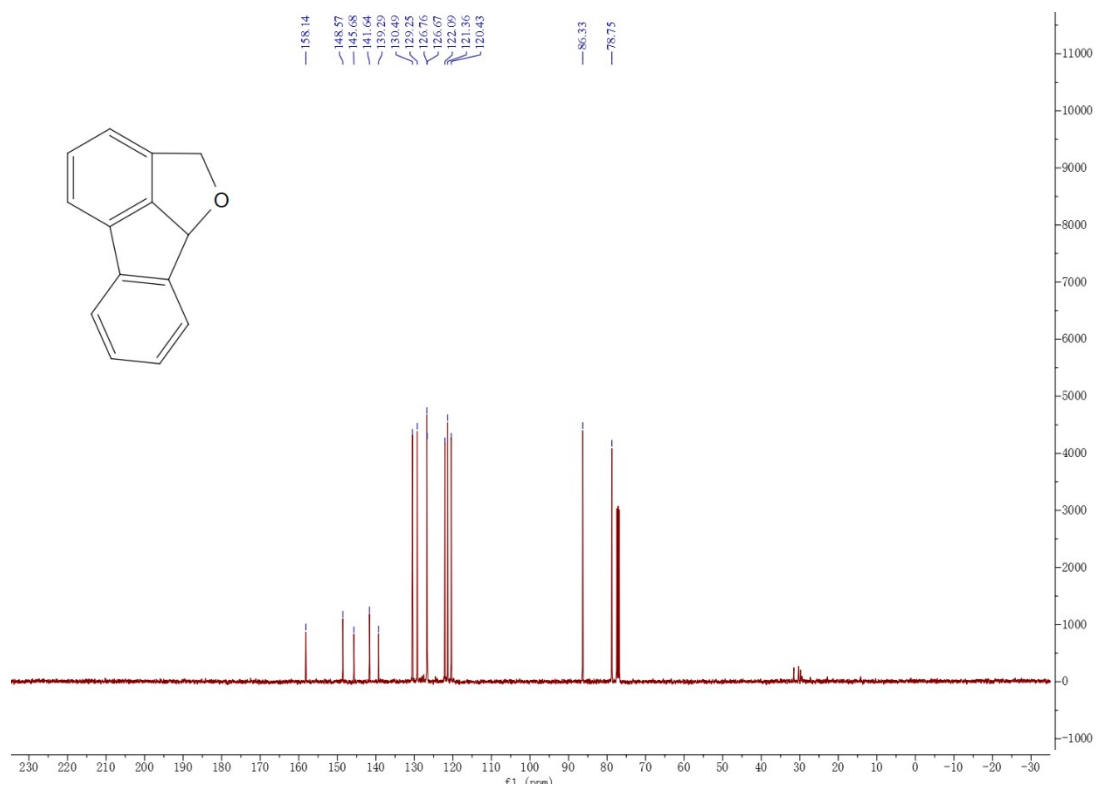

### <sup>1</sup>H NMR (400 MHz, Chloroform-*d*) of 5ia

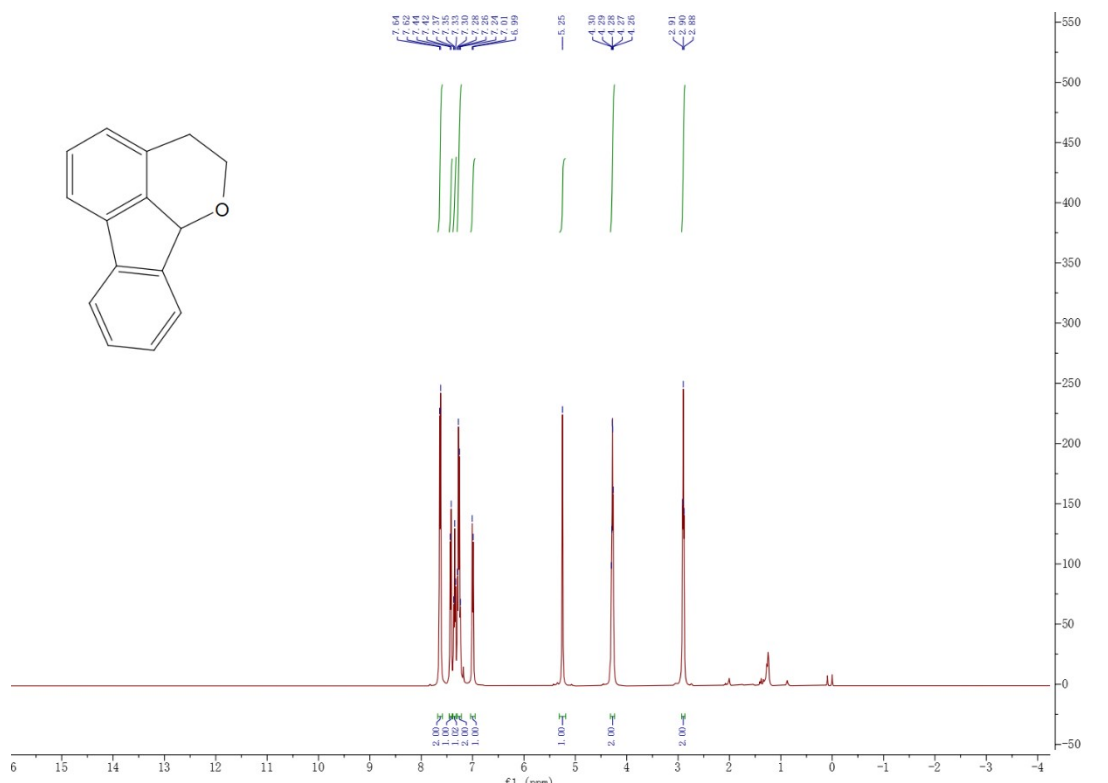

### <sup>13</sup>C NMR (101 MHz, Chloroform-*d*) of 5ia

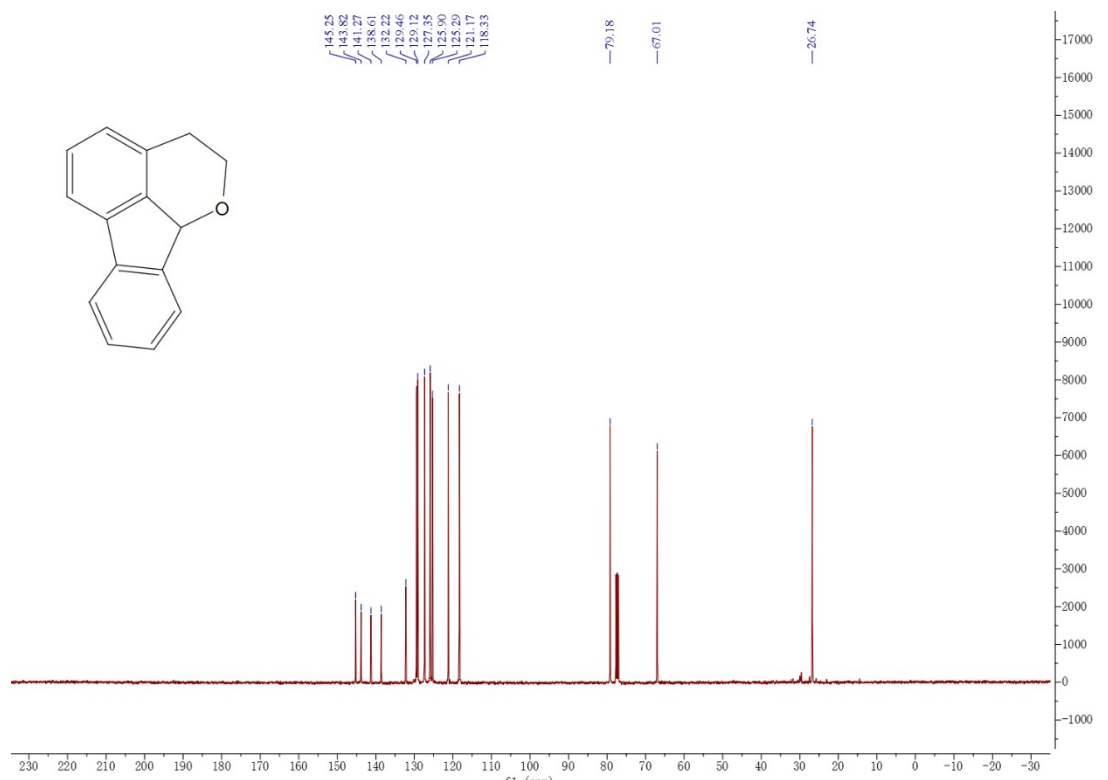

### <sup>1</sup>H NMR (400 MHz, Chloroform-*d*) of 5la

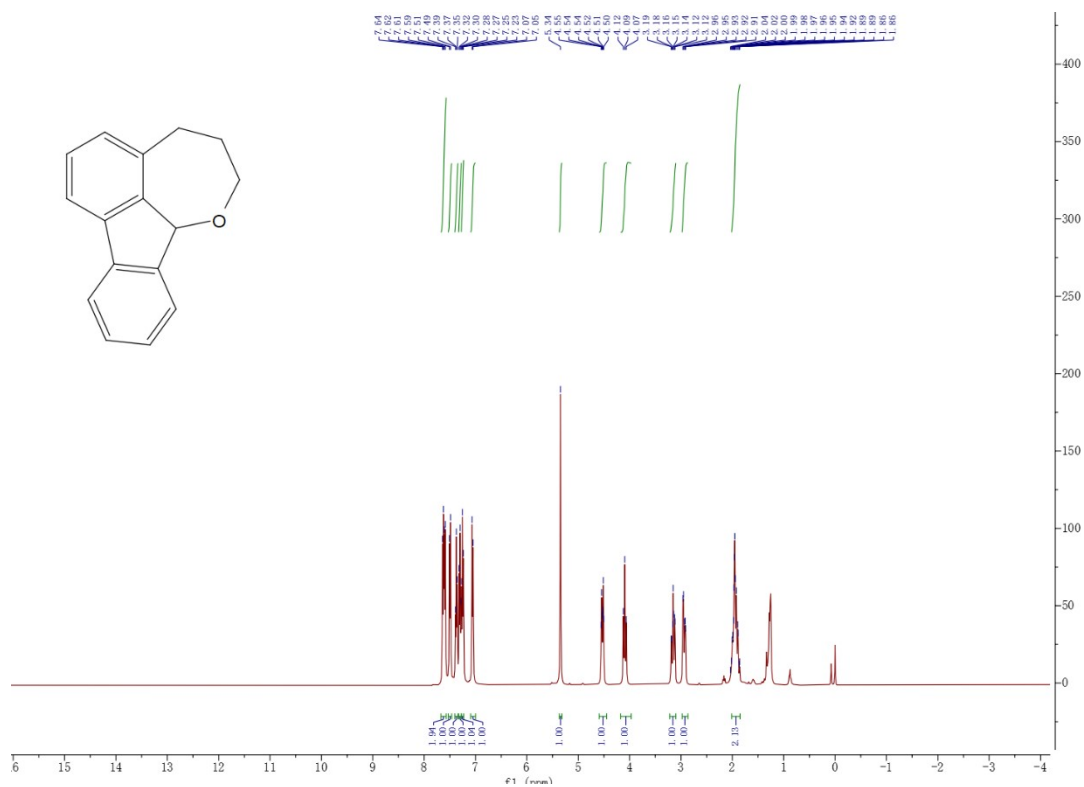

### <sup>13</sup>C NMR (101 MHz, Chloroform-*d*) of 5la

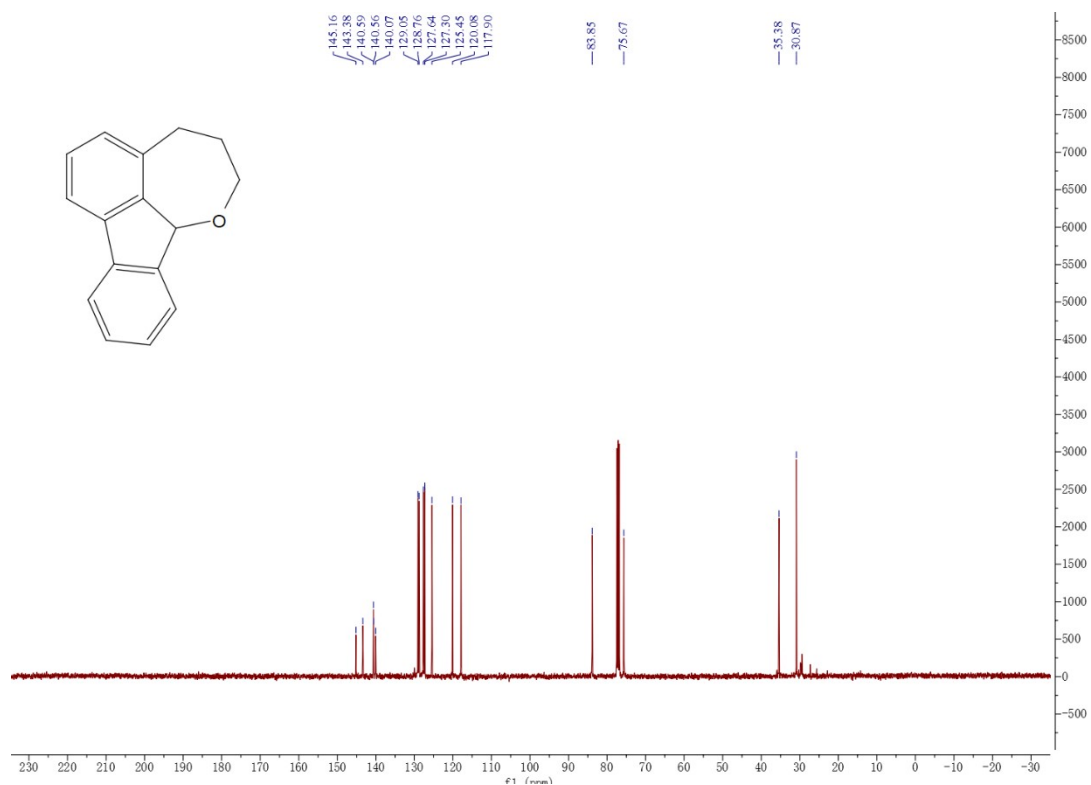

Supplement: d6nj01557c1.pdf [file d6nj01557c1.pdf]
